# Supplementary material for: Design and synthesis of novel phthalocyanines as potential antioxidant and antitumor agents starting with new synthesized phthalonitrile derivatives
Source: Royal Society of Chemistry journal article supplement (doi:10.1039/d1ra05249g), 2021-01-01
Supplement: d1ra05249g1.pdf [file d1ra05249g1.pdf]

## Supplementary information

### **Design and Synthesis of Novel Phthalocyanines as Potential Antioxidant and Antitumor Agents Starting with New Synthesized Phthalonitrile derivatives**

Afnan M. El-badrawy<sup>a</sup>, Ahmed A. Fadda<sup>a</sup>, Ehab Abdel-Latif<sup>a</sup>, and Yasser A. Selim<sup>b,\*</sup>

<sup>a</sup> *Chemistry Department, Faculty of Science, Mansoura University, 35516 Mansoura, Egypt.*

<sup>b</sup> *Faculty of Specific Education, Zagazig University, 44519, Zagazig, Egypt*

\* Corresponding author. *E-mail address:* [afadda50@yahoo.com](mailto:afadda50@yahoo.com) , [y2selem@yahoo.com](mailto:y2selem@yahoo.com)

#### **Abstract**

Formation of new phthalonitrile derivatives from reaction of 2,3-dichloro-5,6-dicyano-1,4-benzoquinone (DDQ) considered as the key intermediate for the synthesis of new phthalocyanines. Moreover, new phthalonitrile derivatives **2**, **5**, **9**, **10**, **15** and **16** were reacted with 1,4-diazabicyclo[2.2.2]octane (DBO) or hydroquinone to afford the corresponding new phthalocyanine dyes **3**, **6**, **11**, **12**, **17** and **18**, respectively. In addition, cyclotetramerization of phthalic anhydride derivative **20** afforded new phthalocyanine dye **22**. The correct structures of the newly synthesized phthalocyanines were confirmed by spectral and elemental analyses. The antioxidant and cytotoxicity of the new compounds were studied and showed that compounds **17** and **18** have a very strong activity against all cell lines and act as good antitumor and antioxidant agents.

**Keywords:** Phthalonitrile, cyclotetramerization, phthalocyanines, disilazane, antioxidant activity and antitumor activity

## Experimental Section

### *General remarks*

Melting points were measured using an Electro thermal IA 9100 apparatus with open capillary tube and are uncorrected. All experiments were carried out using drying solvents. Products were purified by recrystallization. All reaction was carried out under microwave (Discover™ by CEM, 2450 MHz, 20 bar, 300 W, 180 °C). The UV spectra were recorded on Bye-Unicam SP-1800 spectrometer. The IR spectrum (KBr discs) was recorded on a Pye Unicam Sp<sup>-3</sup>-300 or a Shimadzu FTIR 8101 PC infrared spectrophotometer. The <sup>1</sup>H NMR 400 MHz and <sup>13</sup>CNMR 100 MHz spectrum were measured on a JEOL-JNM-LA spectrometer using DMSO as a solvent. All chemical shifts were expressed on the  $\delta$  (ppm) scale using TMS as an internal standard reference. The coupling constant (*J*) values are given in Hz. Analytical data were obtained from the Micro analytical Center, Faculty of pharmacy, Cairo University, Cairo, Egypt. The mass spectra were recorded on a MS-S988 instrument operating at 70 eV. [23].

### **3.3. Biochemical assays (Antioxidant and antitumor properties)**

#### ***3.3.1. Antioxidant properties***

##### ***3.3.1.1. DPPH radical scavenging capacity***

The evaluation of the antioxidant activity of new Phthalocyanines was done by (DPPH) radical scavenging activity. CuONPs, PdNPs and L-ascorbic corrosive were estimated as far as hydrogen giving or revolutionary searching capacity utilizing the steady extremist DPPH. About 0.1 mM t of DPPH in ethanol was ready and was added to 3.0 ml of new Phthalocyanines (20-100  $\mu\text{g/ml}$ ). After thirty minutes, the absorbance was estimated at 517 nm. The IC<sub>50</sub> esteem was characterized as the focus (in  $\mu\text{g/ml}$ ) of concentrates that restrains the development of DPPH revolutionaries by 50 %. The aftereffects of hostile to

oxidant action of Phthalocyanines, utilizing DPPH free revolutionary searching technique is arranged in table 2.

### **3.3.1.2. Hydroxyl-radical scavenging assay:**

The degradation of 2-deoxy-D-ribose by OH radicals generated in situ in Fenton's reaction [24] was used to determine the studied compounds' hydroxyl-radical scavenging capacity (HO• RSC). These radicals breakdown the sugar 2-deoxy-D-ribose into a set of fragments, some or all of which react with 2-TBA at low pH to create a pink chromogen that can be measured by spectrophotometric method at 532 nm. Different aliquots (0.005–0.5 mL) of sample solution in methanol were added to test tubes (final concentration ranged between 0.01 and 8 mM), each containing 0.1 mL of 5 mM H<sub>2</sub>O<sub>2</sub>, 0.1 mL of 10 mM FeSO<sub>4</sub> and 0.1 mL of 0.05 M 2-deoxy-D-ribose and 0.067 M KH<sub>2</sub>PO<sub>4</sub>-K<sub>2</sub>HPO<sub>4</sub> buffer pH 7.4 to a final volume of 3 mL. Another reaction mixture under the same condition and without sample was used as the control. After an incubation period of 1 h at 37 °C, 2 mL of TBA reagent (10.4 mL of 60% (v/v) HClO<sub>4</sub>, 3 g TBA and 120 g of trichloroacetic acid, and 0.2 mL of 0.1 M EDTA were added to the reaction mixture, and the tubes were heated at 100°C for 20 min. After cooling, absorbance of the reaction mixtures and control was recorded at 532 nm. Percentage of HO• RSC was calculated using the following equation:

$$\text{RSC (\%)} = (\text{A}_{\text{blank}} - \text{A}_{\text{sample}} / \text{A}_{\text{blank}}) \times 100$$

Three replicates were recorded for each sample; BHT and BHA were used as reference compounds. See table 2.

### **3.3.2. Cytotoxicity assays**

The cytotoxic activity of the newly synthesised Phthalocyanines a dyes was tested against two cell lines, human hepatocellular liver carcinoma cell line (HepG2) and human breast adenocarcinoma cell line (MCF-7) with human lung fibroblast cell line (WI-38) and adult African green monkey kidney cell line (VERO) as controls. After a 7-day bath culture, the cells were planted in 96-well plates at 37 °C for 24 h. Under 5% CO<sub>2</sub>. The

cells were cultured either alone (negative control) or with various concentrations of sample (1000, 500, 200, 50 mg/mL). In 96-well flat bottom microplates, cells were suspended in RPMI-1640 media with 1% antibiotic-antimycotic mixture (104 m/mL potassium penicillin, 104 mg/mL streptomycin sulphate, and 25 mg/mL Amphotericin B) and 1% L-glutamin at 37 °C under 5 % CO<sub>2</sub>. After 96 h of incubation, the medium was again aspirated, trays were inverted onto a pad of paper towels, the remaining cells rinsed carefully with medium, and fixed with 3.7% (v/v) formaldehyde in saline for at least 30 min. The % viability of cells was examined visually as described previously. [25, 26]. See table 3.

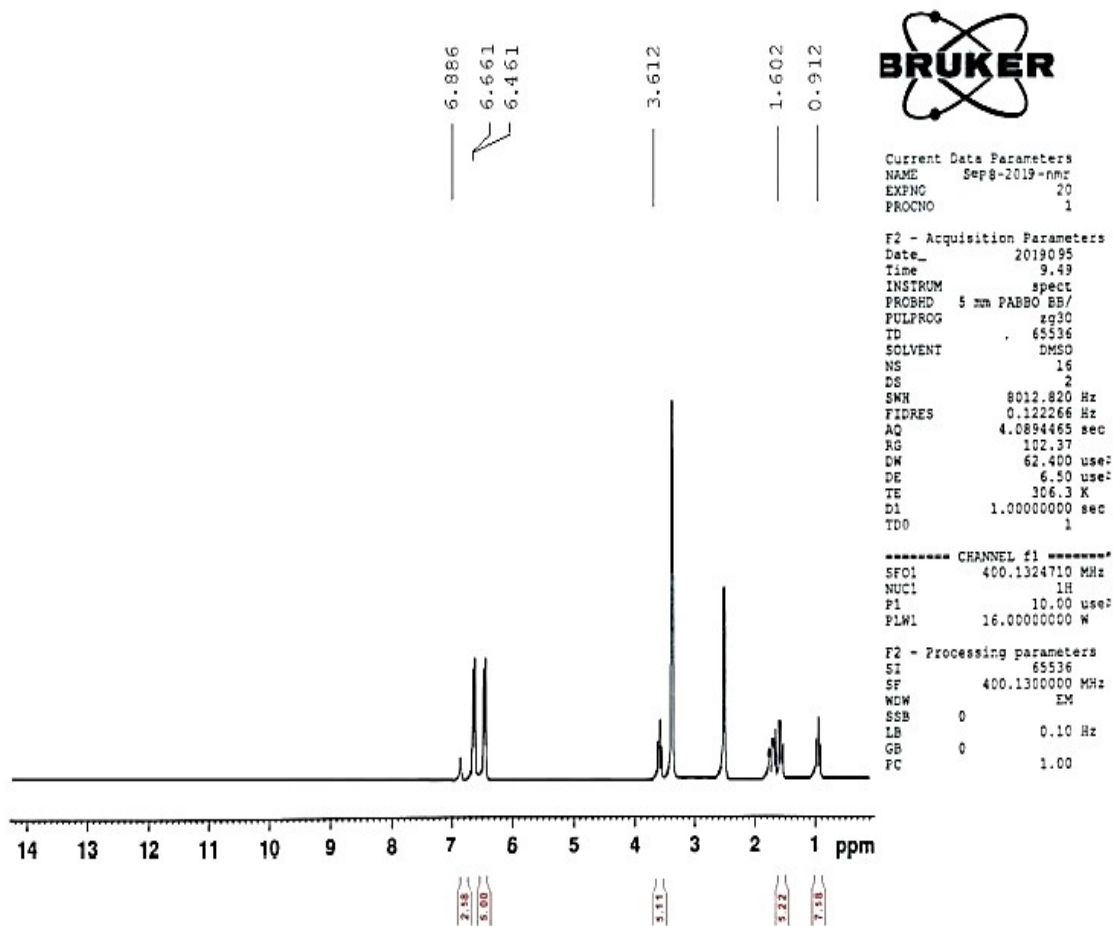

Fig. (S1): <sup>1</sup>H NMR Spectrum of Compound (1)

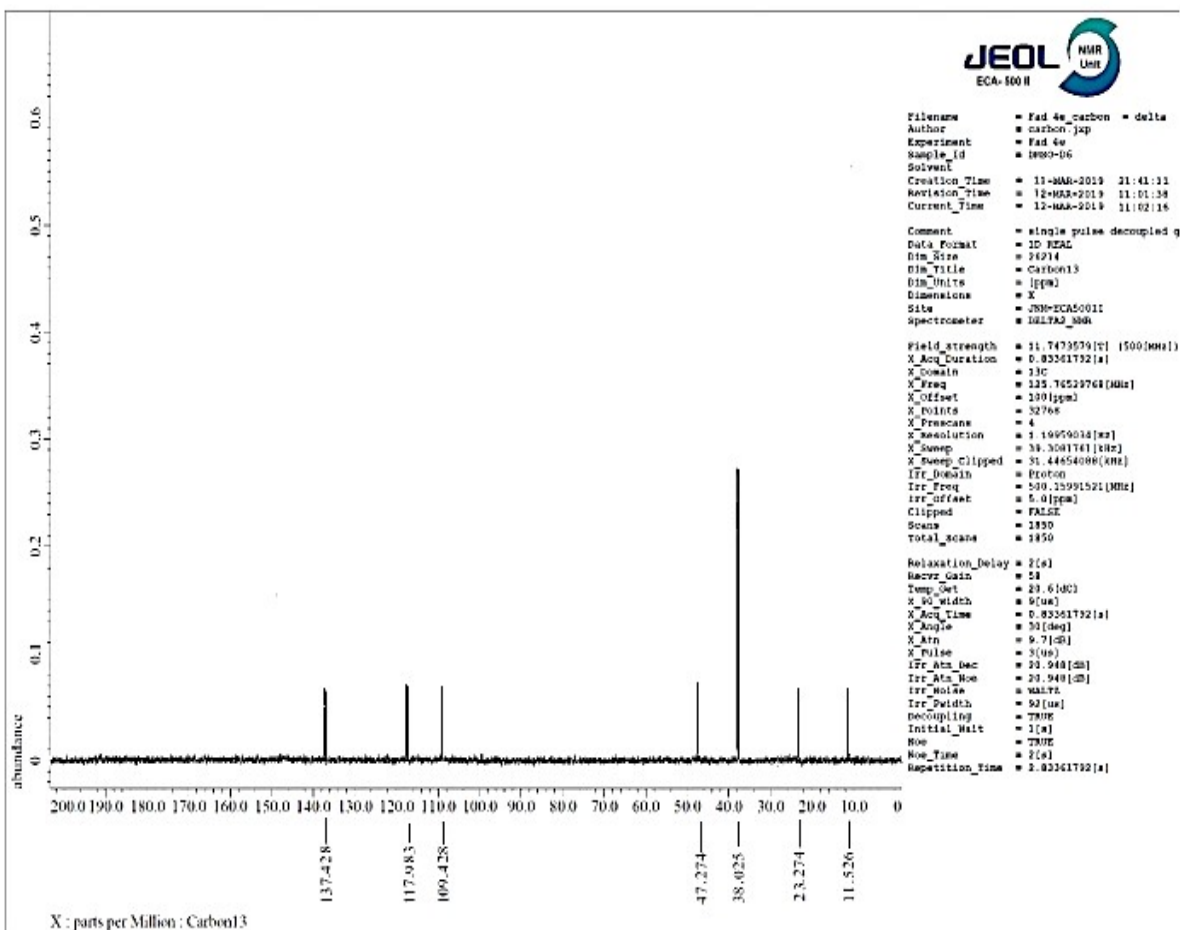

Fig. (S2): <sup>13</sup>C NMR Spectrum of Compound (1)

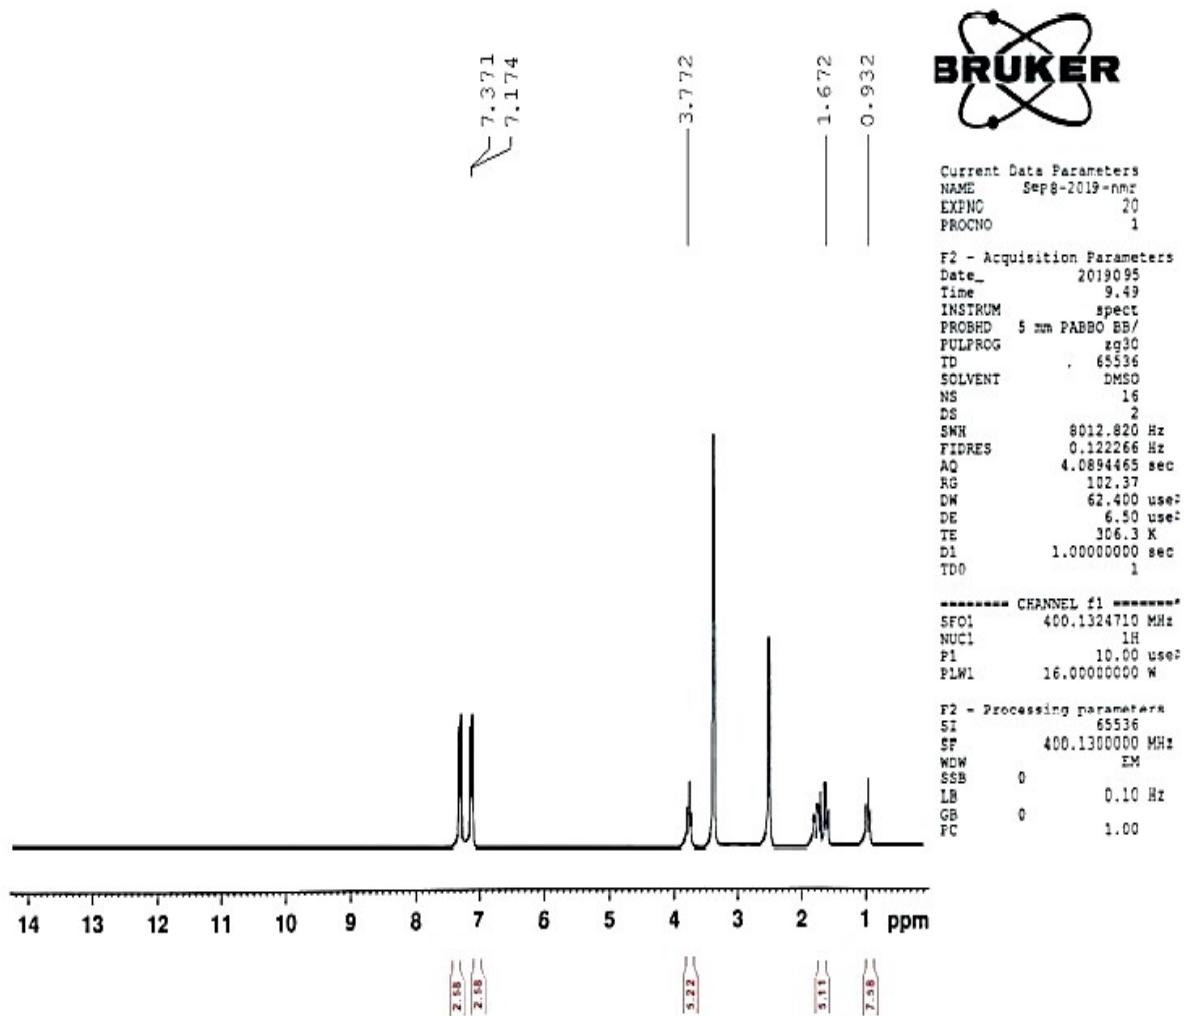

Fig. (S3): <sup>1</sup>H NMR Spectrum of Compound (2)

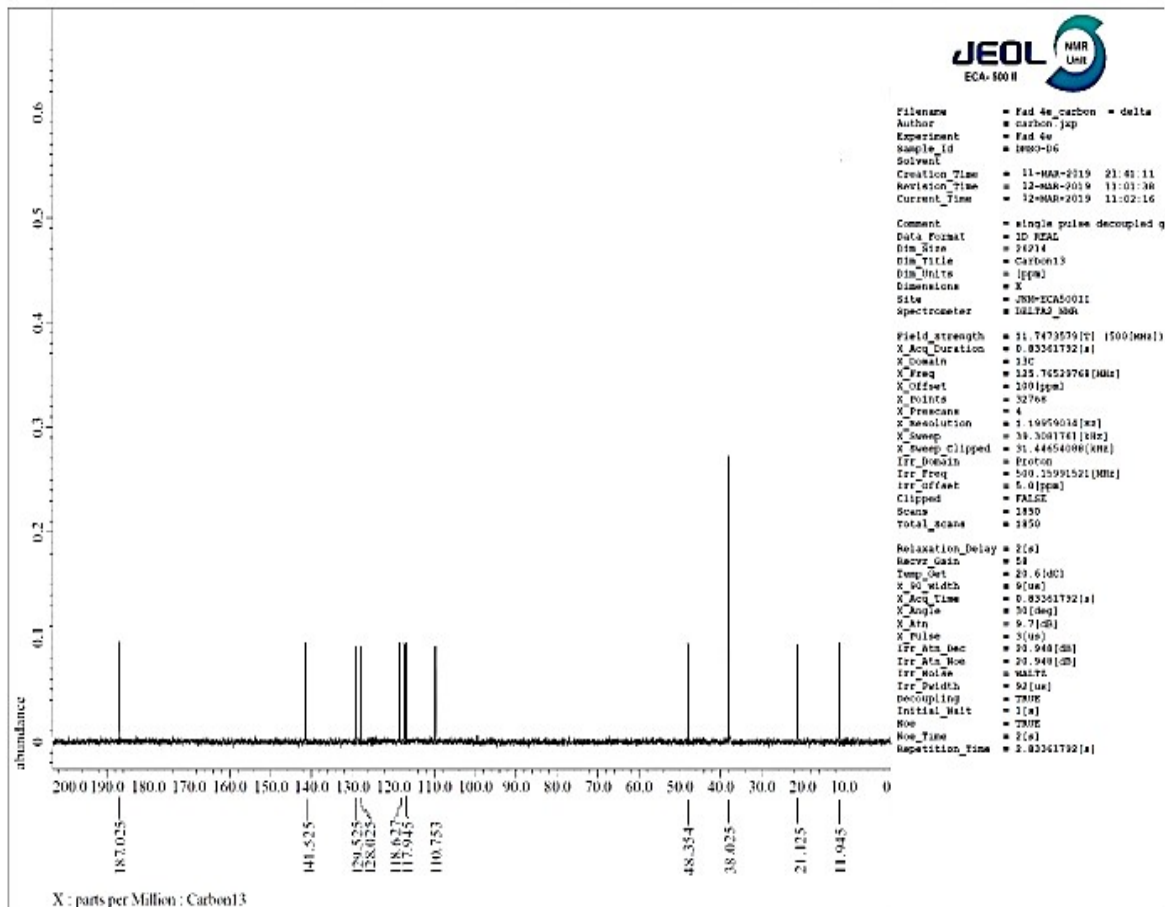

Fig. (S4): <sup>13</sup>C NMR Spectrum of Compound (2)



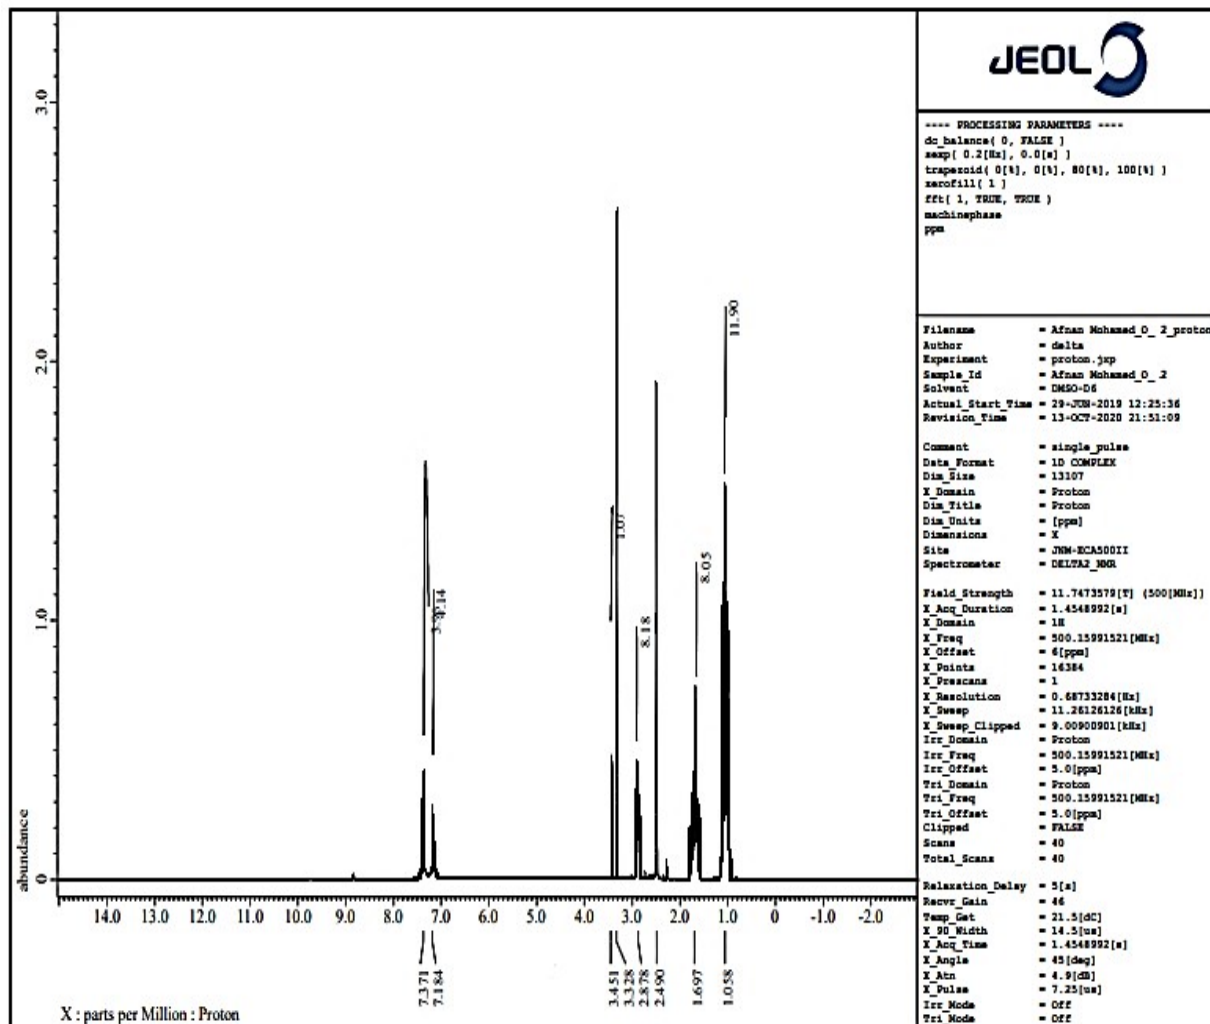

Fig. (S5): <sup>1</sup>H NMR Spectrum of Compound (3)

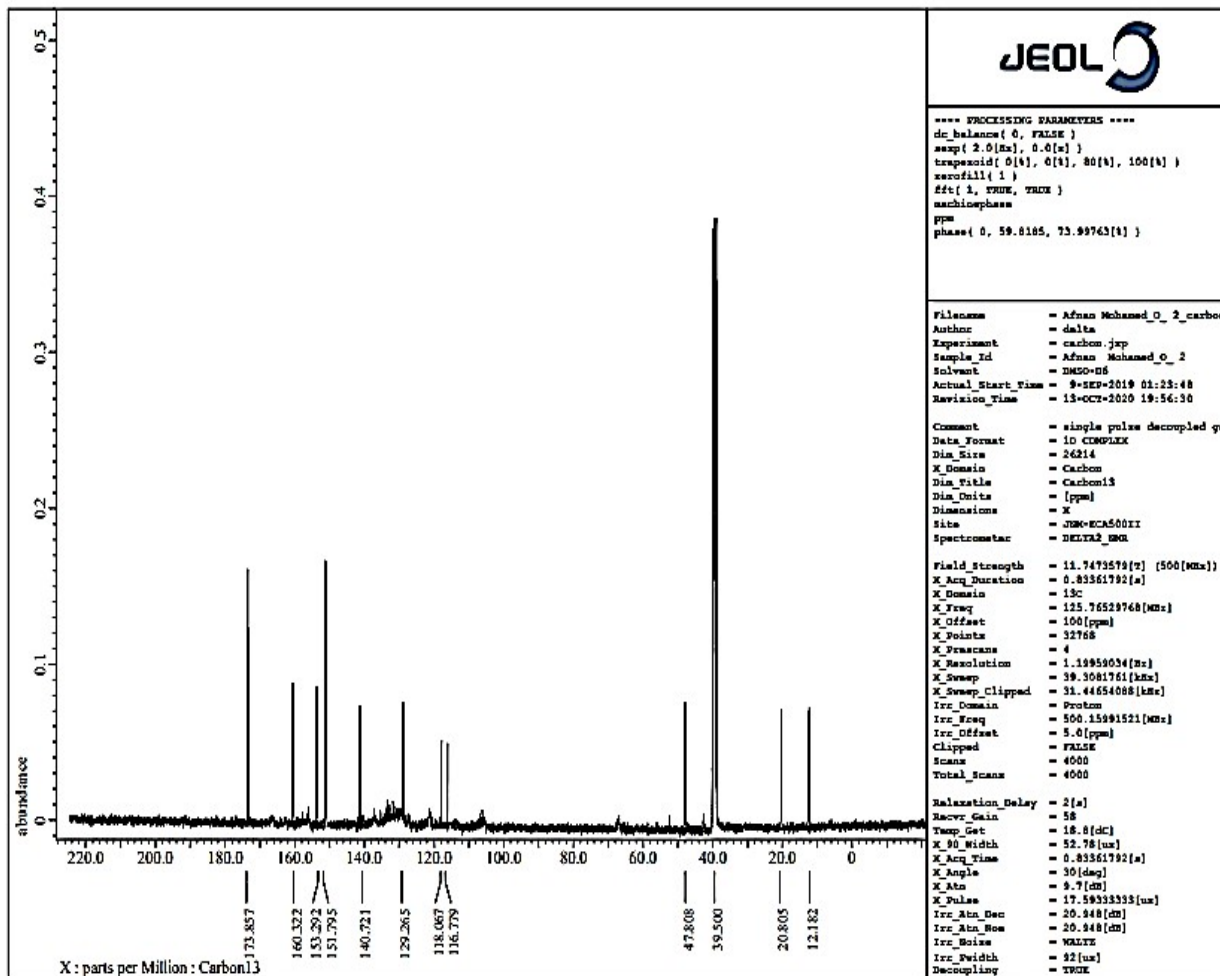

Fig. (S6): <sup>13</sup>C NMR Spectrum of Compound (3)

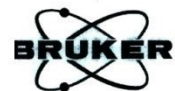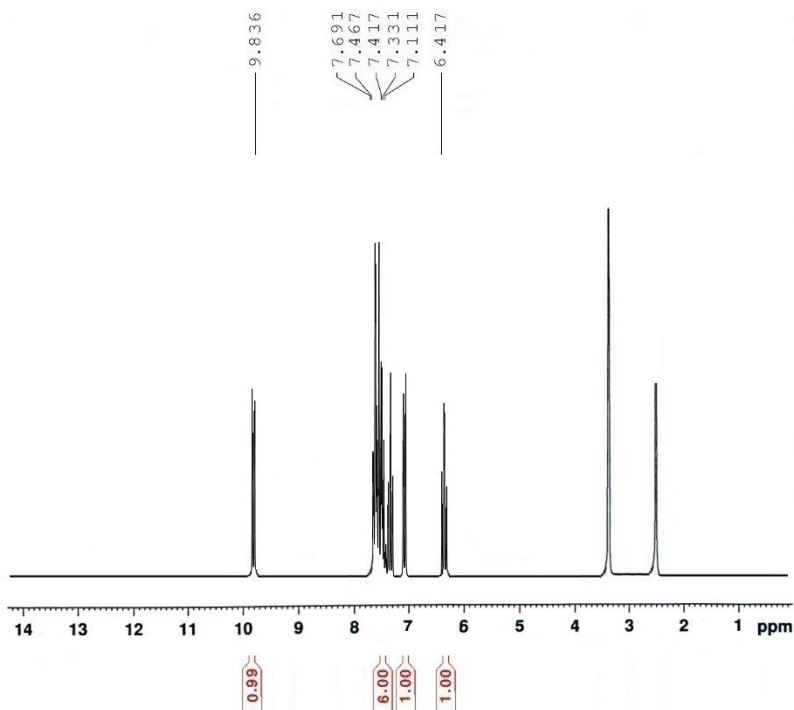

Current Data Parameters  
NAME Sep8-2019-nmr  
EXPNO 20  
PROCNO 1

F2 - Acquisition Parameters  
Date\_ 2019098  
Time 9.49  
INSTRUM spect  
PROBHD 5 mm PABBO BB/  
PULPROG zg30  
TD 65536  
SOLVENT DMSO  
NS 16  
DS 2  
SMH 8012.820 Hz  
FIDRES 0.122266 Hz  
AQ 4.089465 sec  
RG 102.37  
DM 62.400 usec  
DE 6.50 usec  
TE 306.3 K  
D1 1.00000000 sec  
TDO 1

----- CHANNEL f1 -----  
SFO1 400.1324710 MHz  
NUC1 1H  
P1 10.00 usec  
PLW1 16.00000000 W

F2 - Processing parameters  
SI 65536  
SF 400.1300000 MHz  
WDW EM  
SSB 0  
LB 0.10 Hz  
GB 0  
PC 1.00

Fig. (S7): <sup>1</sup>H NMR Spectrum of Compound (5)

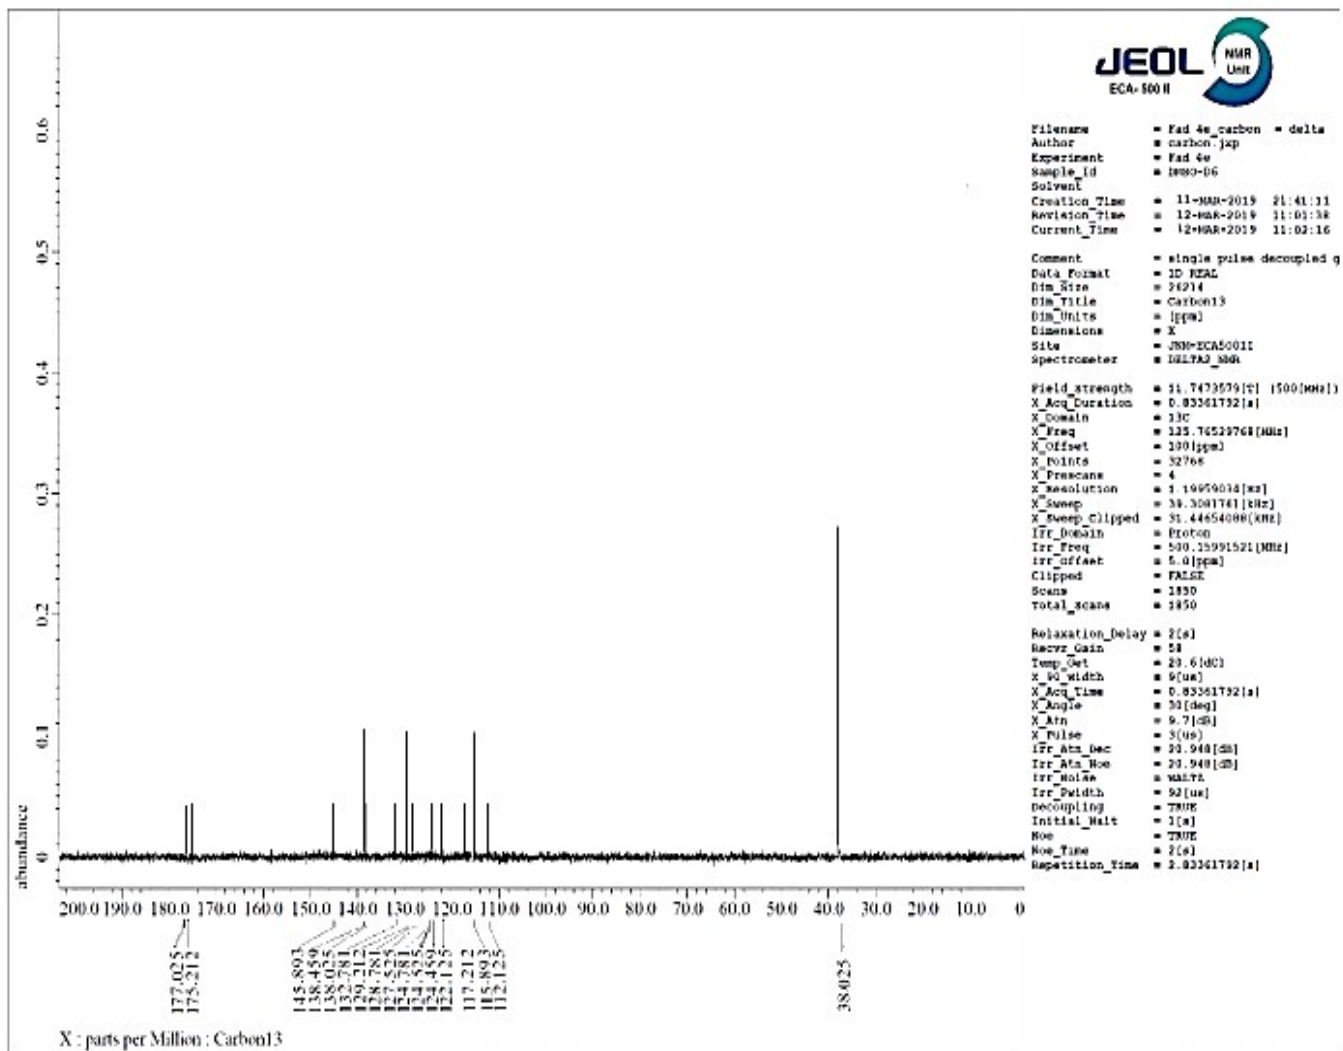

Fig. (S8): <sup>13</sup>C NMR Spectrum of Compound (5)

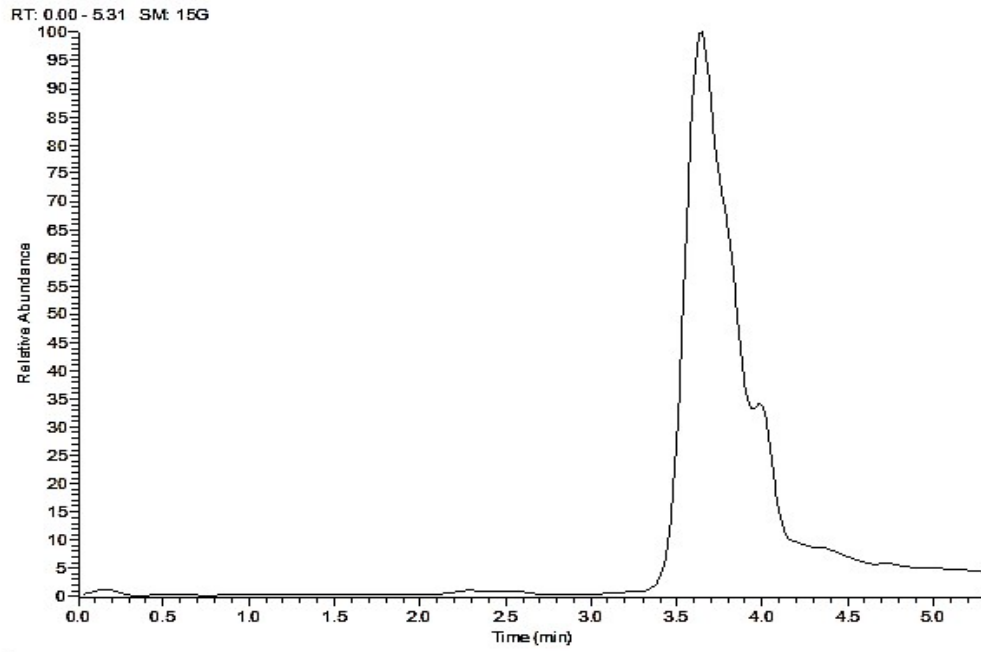

asm.aa ahmed-20-BTPH#215 RT: 3.62 AV: 1 NL: 1.97E5  
T: {0,0} +c EIFul.ms [40.00-1000.00]

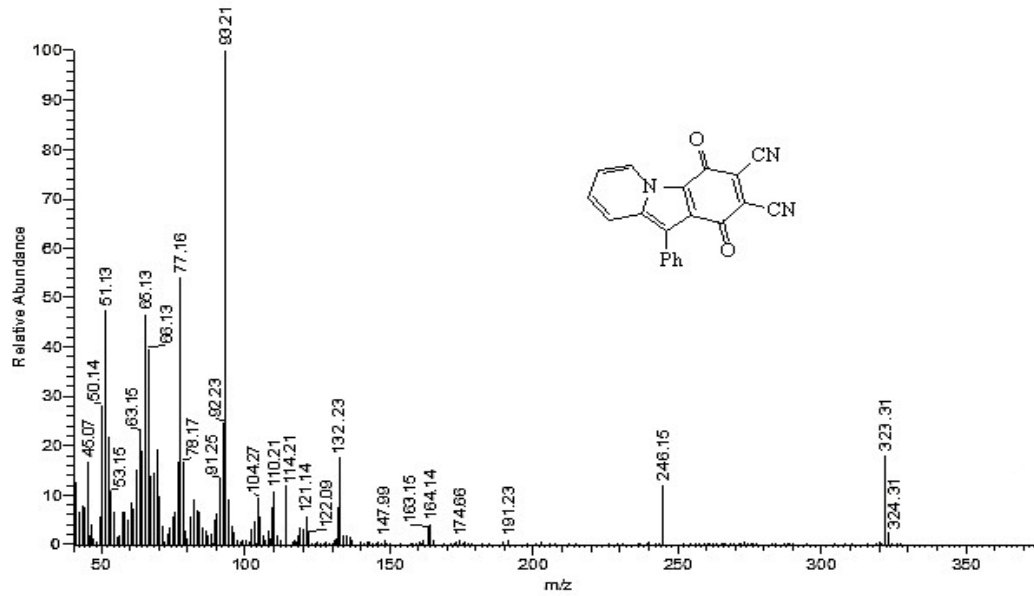

Fig. (S9): MS Spectrum of Compound (5)

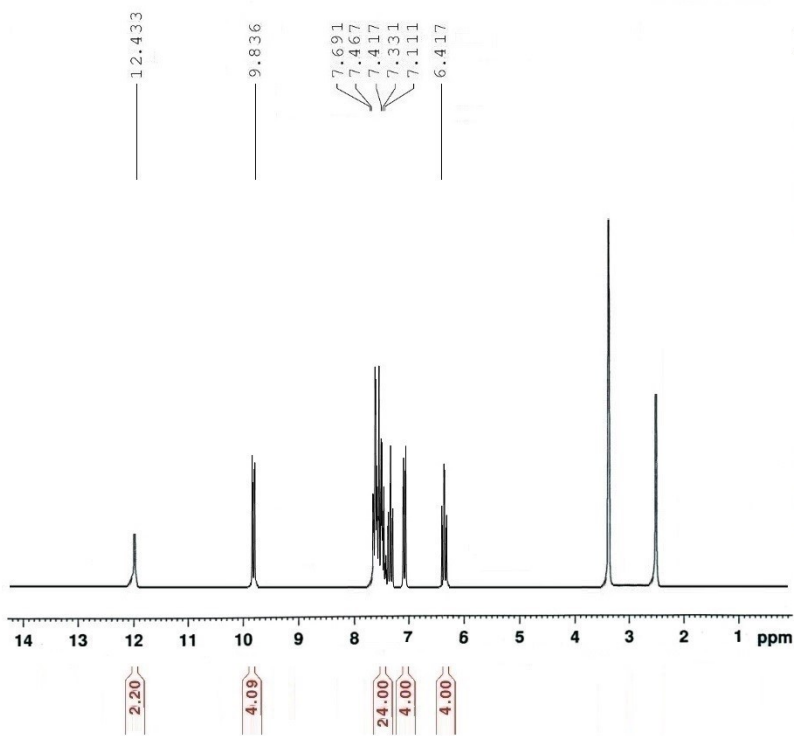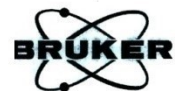

```

Current Data Parameters
NAME      Sep8-2019-nmr
EXPNO    20
PROCNO   1

F2 - Acquisition Parameters
Date_    2019098
Time     9.49
INSTRUM  spect
PROBHD   5 mm PABBO BB/
PULPROG  zg30
TD       65536
SOLVENT  DMSO
NS       16
DS       2
SMH      8012.820 Hz
FIDRES   0.122266 Hz
AQ       4.089465 sec
RG       102.37
DM       62.400 usec
DE       6.50 usec
TE       306.3 K
D1       1.00000000 sec
TD0      1

----- CHANNEL f1 -----
SFO1    400.1324710 MHz
NUC1     1H
P1      10.00 usec
PLW1    16.00000000 W

F2 - Processing parameters
SI      65536
SF      400.1300000 MHz
WDW     EM
SSB     0
LB      0.10 Hz
GB      0
PC      1.00

```

Fig. (S10): <sup>1</sup>H NMR Spectrum of Compound (6)

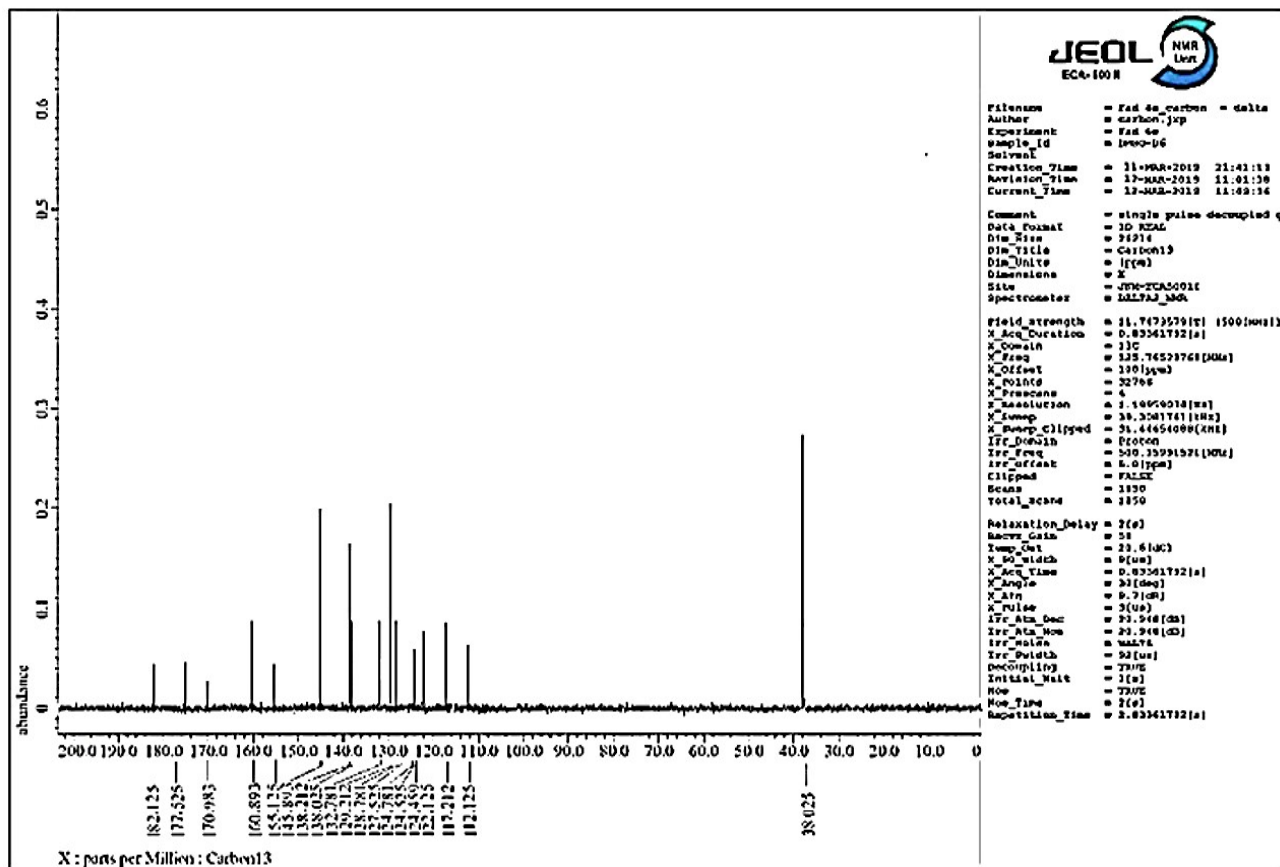

Fig. (S11):  $^{13}\text{C}$  NMR Spectrum of Compound (6)

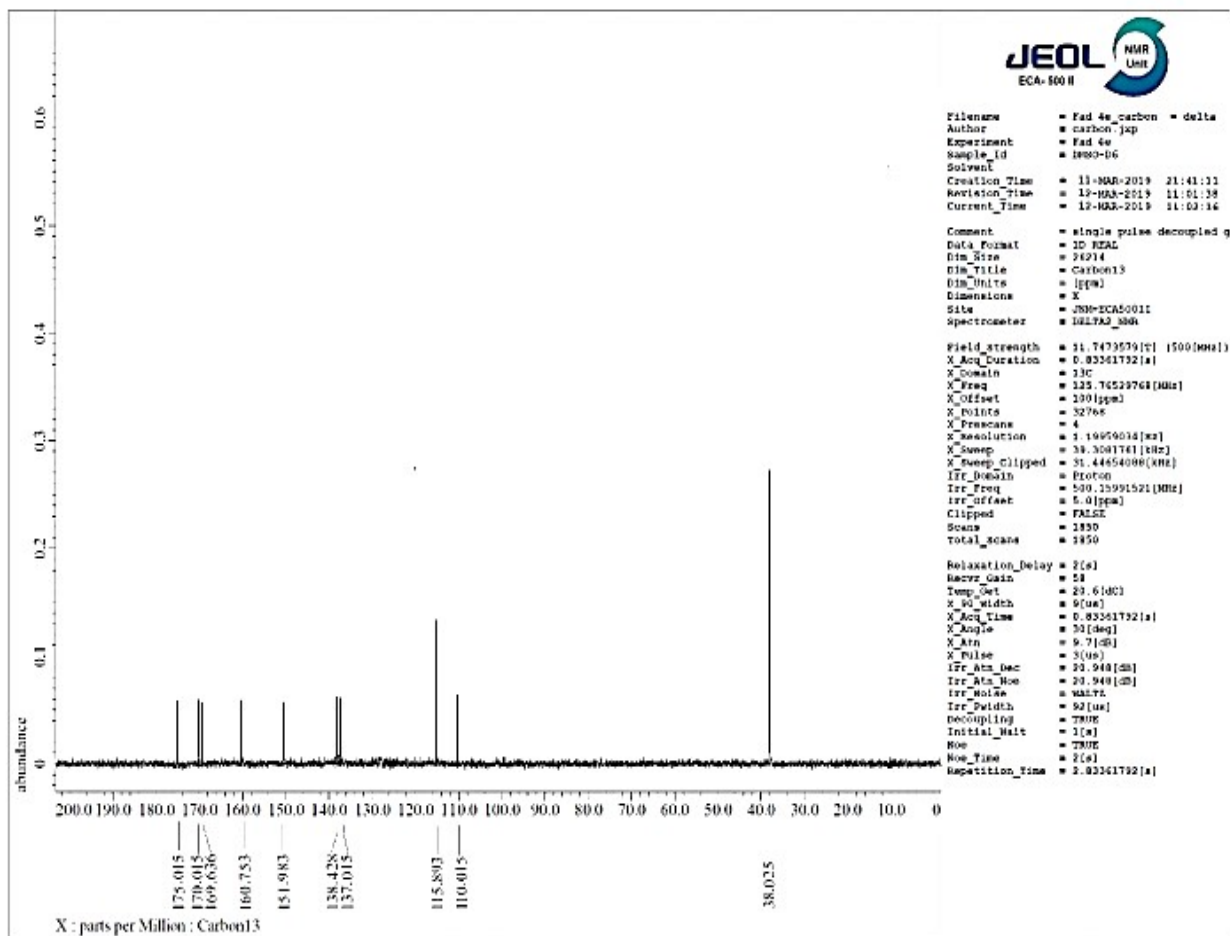

Fig. (S12): <sup>13</sup>C NMR Spectrum of Compound (9)



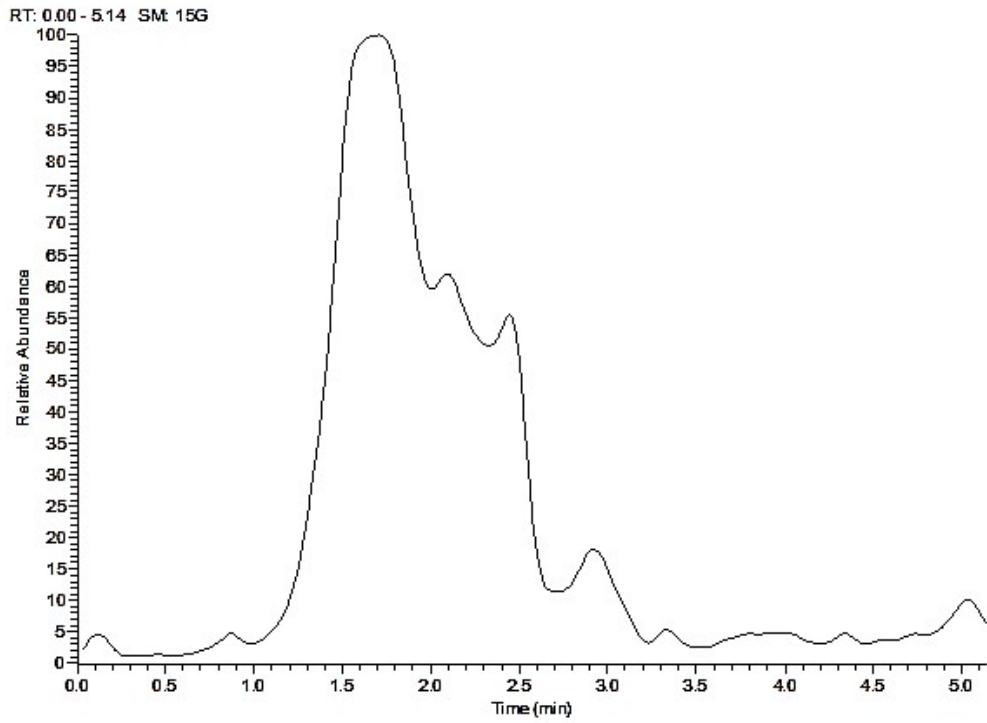

asmaa ahmed -1-BTCY#104 RT: 1.78 AV: 1 NL: 5.30E4  
T: {0,0} +c EI Full ms [40.00-1000.00]

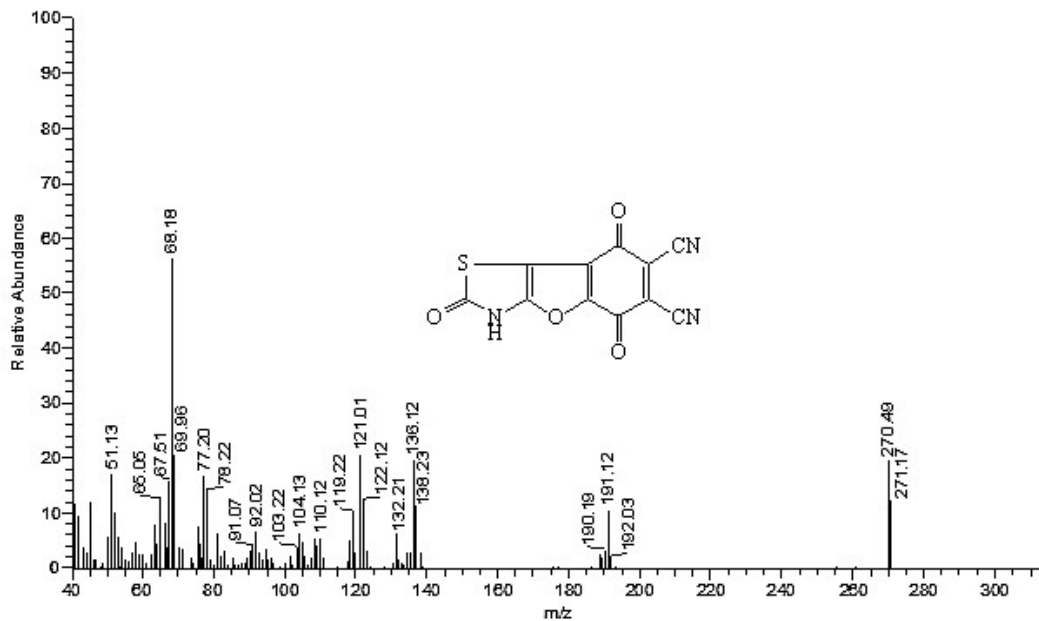

Fig. (S13): MS Spectrum of Compound (9)

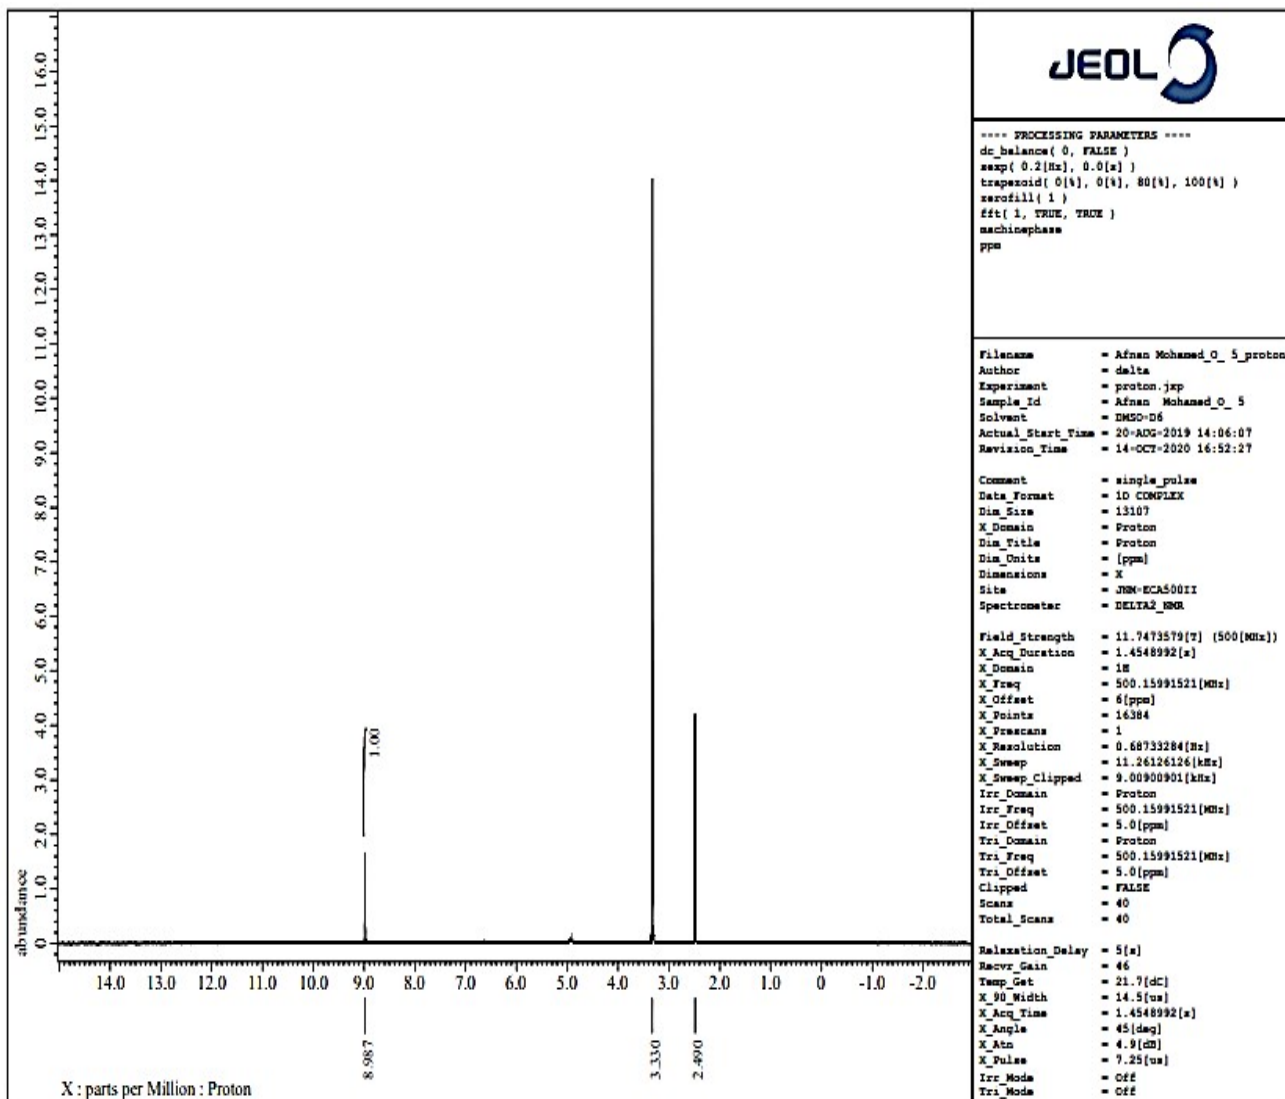

Fig. (S14): <sup>1</sup>H NMR Spectrum of Compound (10)

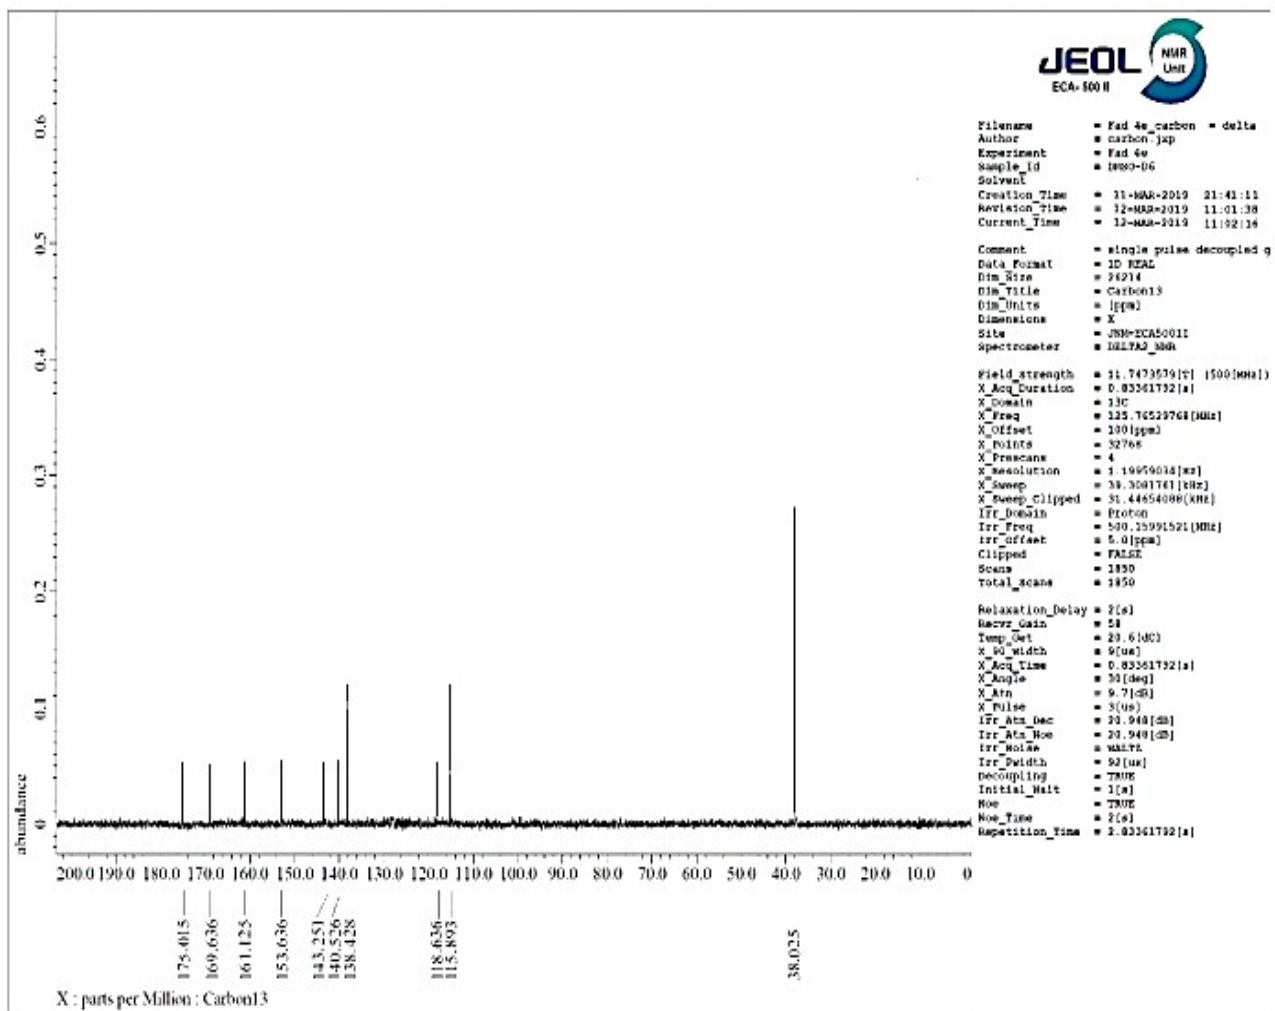

Fig. (S15): <sup>13</sup>C NMR Spectrum of Compound (10)

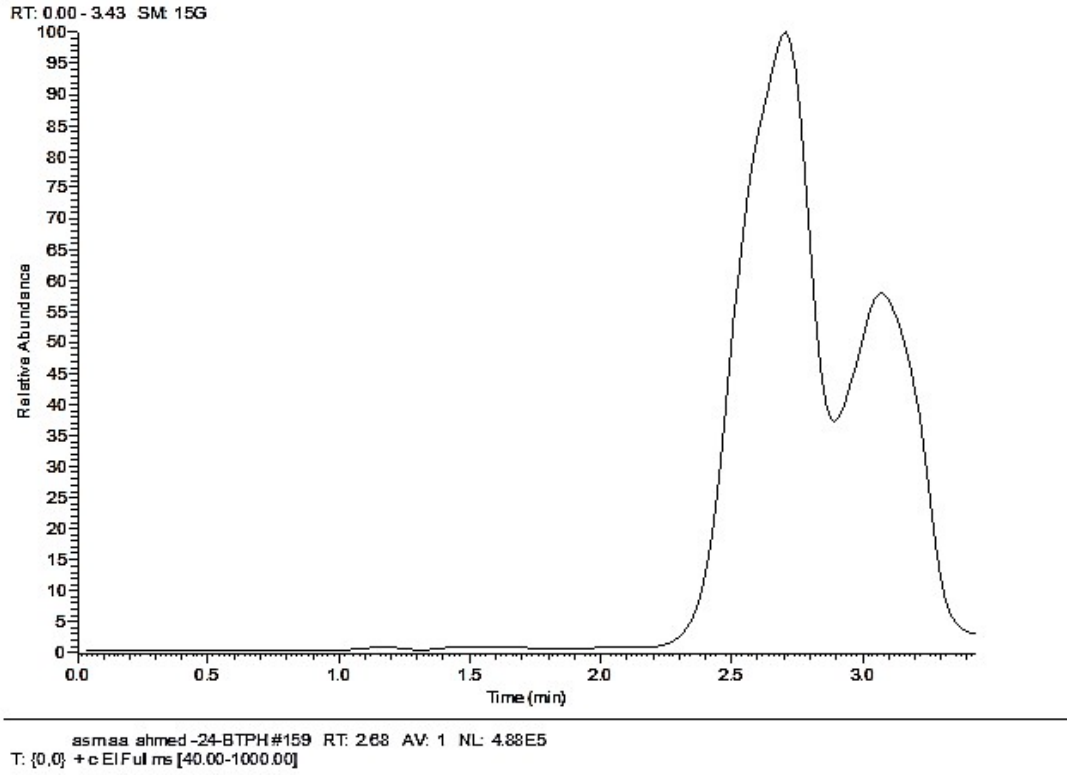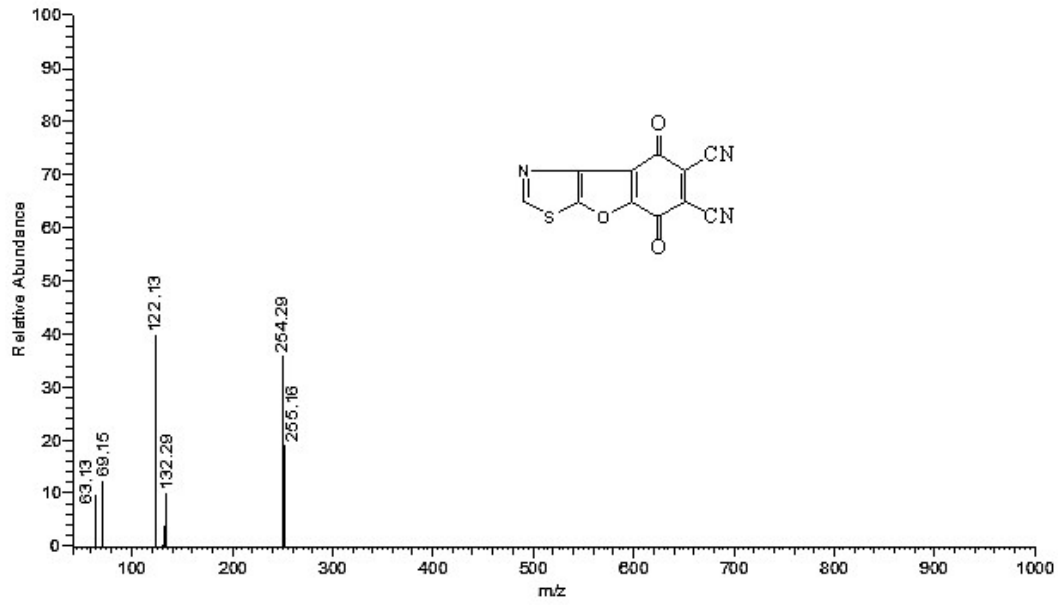

Fig. (S16): MS Spectrum of Compound (10)

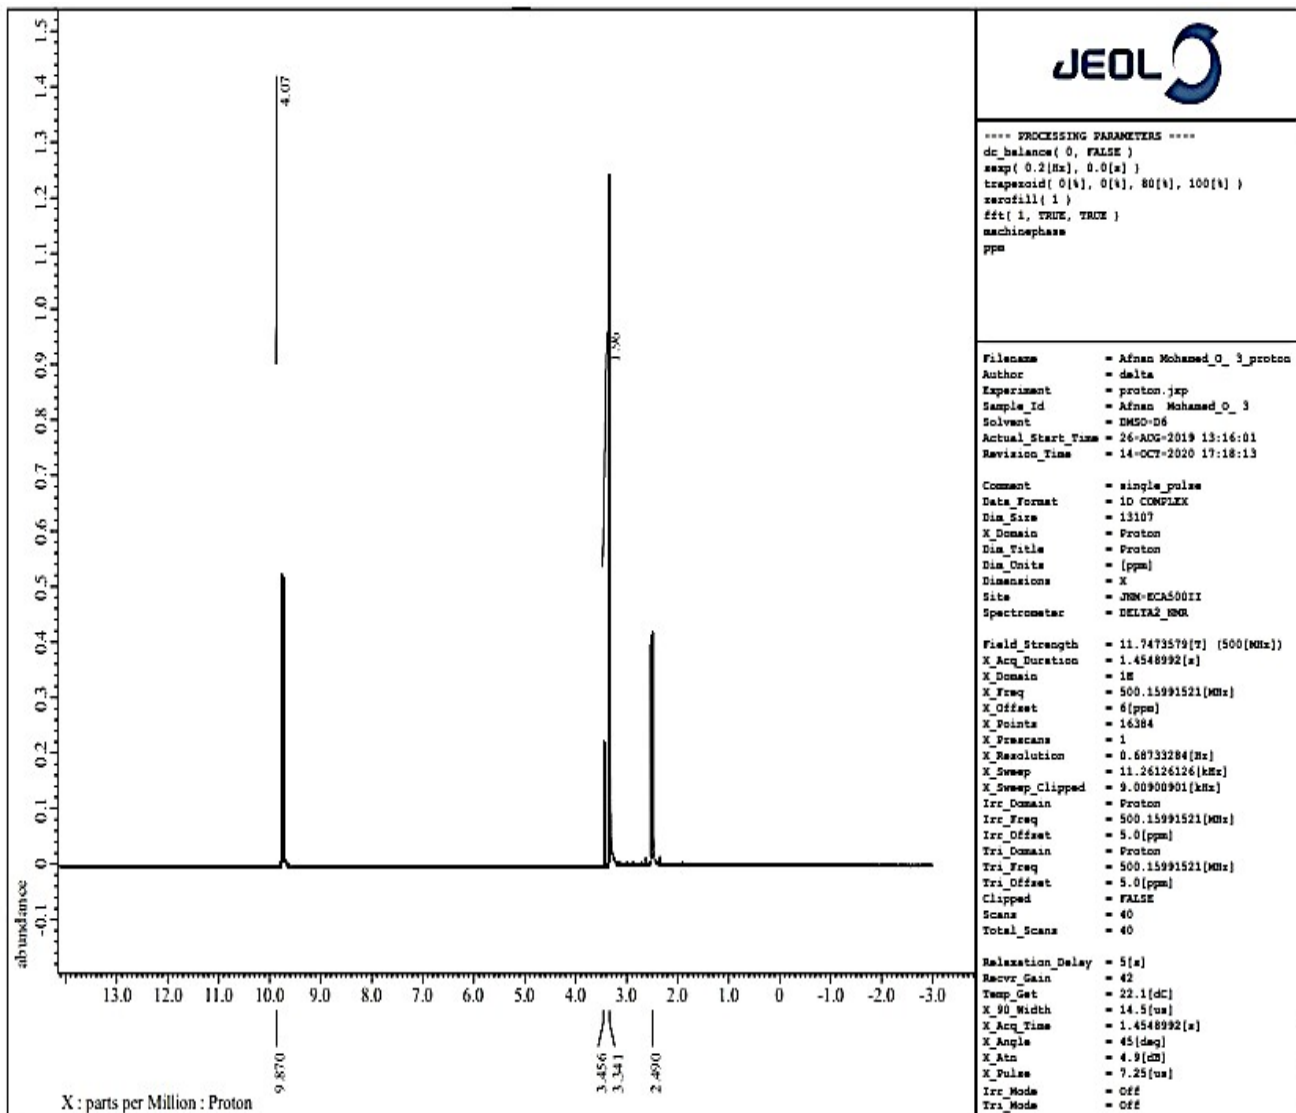

Fig. (S17):  $^1\text{H}$  NMR Spectrum of Compound (11)

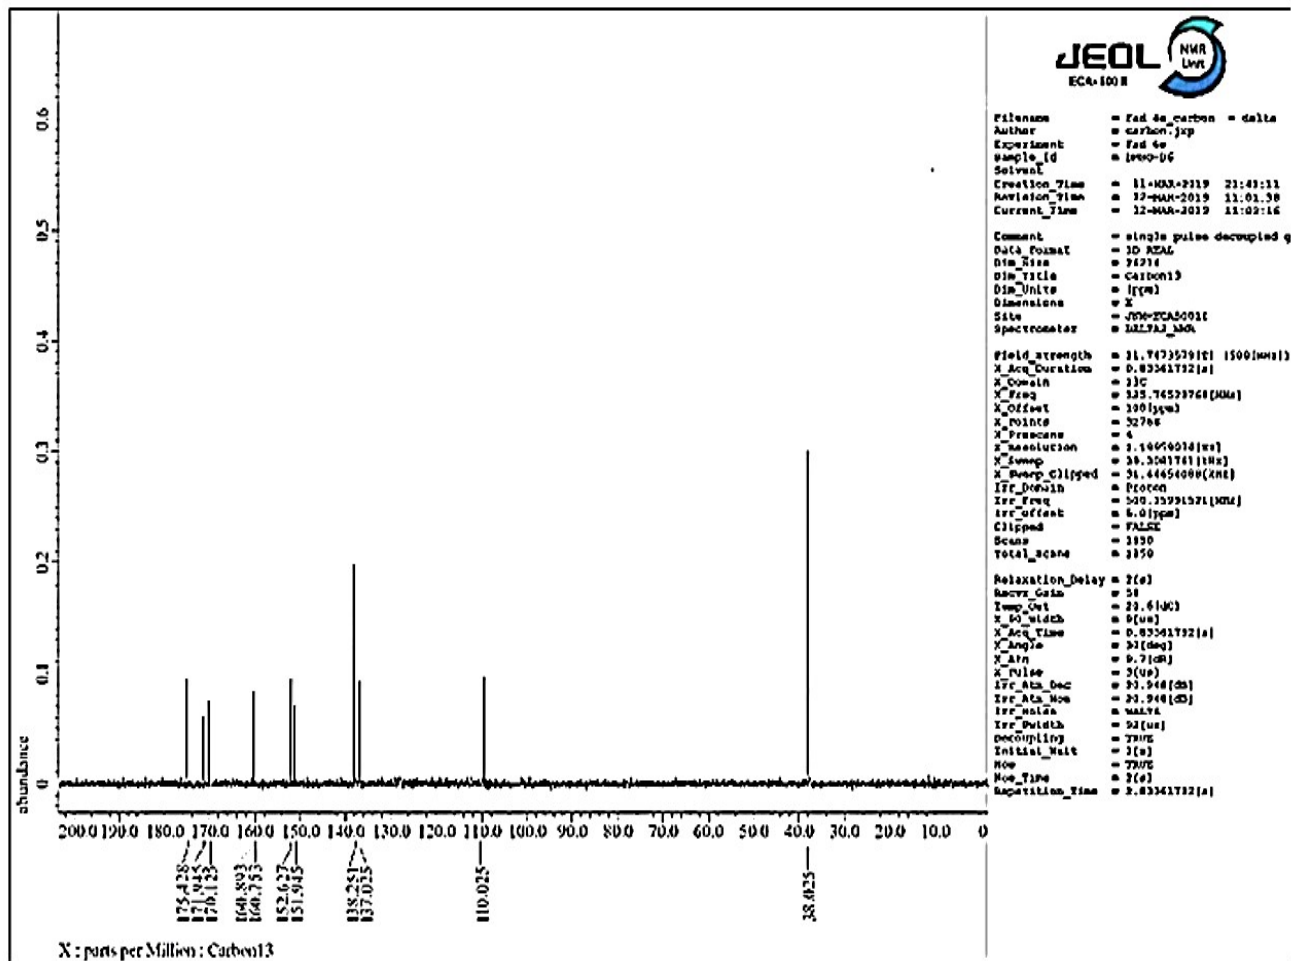

Fig. (S18): <sup>13</sup>C NMR Spectrum of Compound (11)

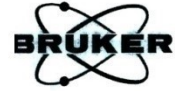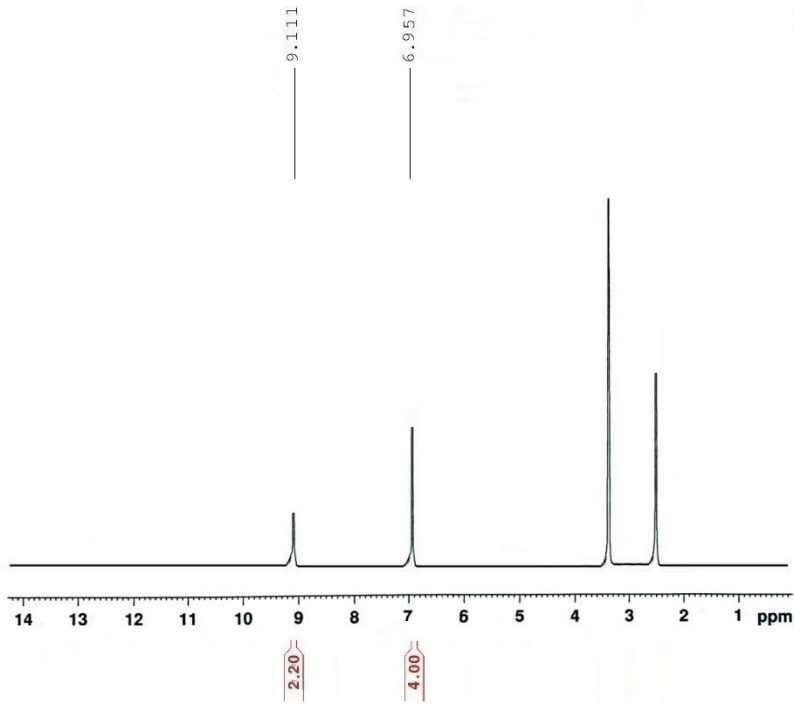

```
Current Data Parameters
NAME      Sep8-2019-nmr
EXPNO    20
PROCNO   1

F2 - Acquisition Parameters
Date_    2019098
Time     9.49
INSTRUM  spect
PROBHD   5 mm PABBO BB/
PULPROG  zg30
TD       65536
SOLVENT  DMSO
NS       16
DS       2
SMH      8012.820 Hz
FIDRES   0.122266 Hz
AQ       4.089465 sec
RG       102.37
DM       62.400 usec
DE       6.50 usec
TE       306.3 K
D1       1.00000000 sec
TD0      1

----- CHANNEL f1 -----
SFO1     400.1324710 MHz
NUC1     1H
P1       10.00 usec
PLW1     16.00000000 W

F2 - Processing parameters
SI       65536
SF       400.1300000 MHz
WDW      EM
SSB      0
LB       0.10 Hz
GB       0
PC       1.00
```

Fig. (S19): <sup>1</sup>H NMR Spectrum of Compound (12)

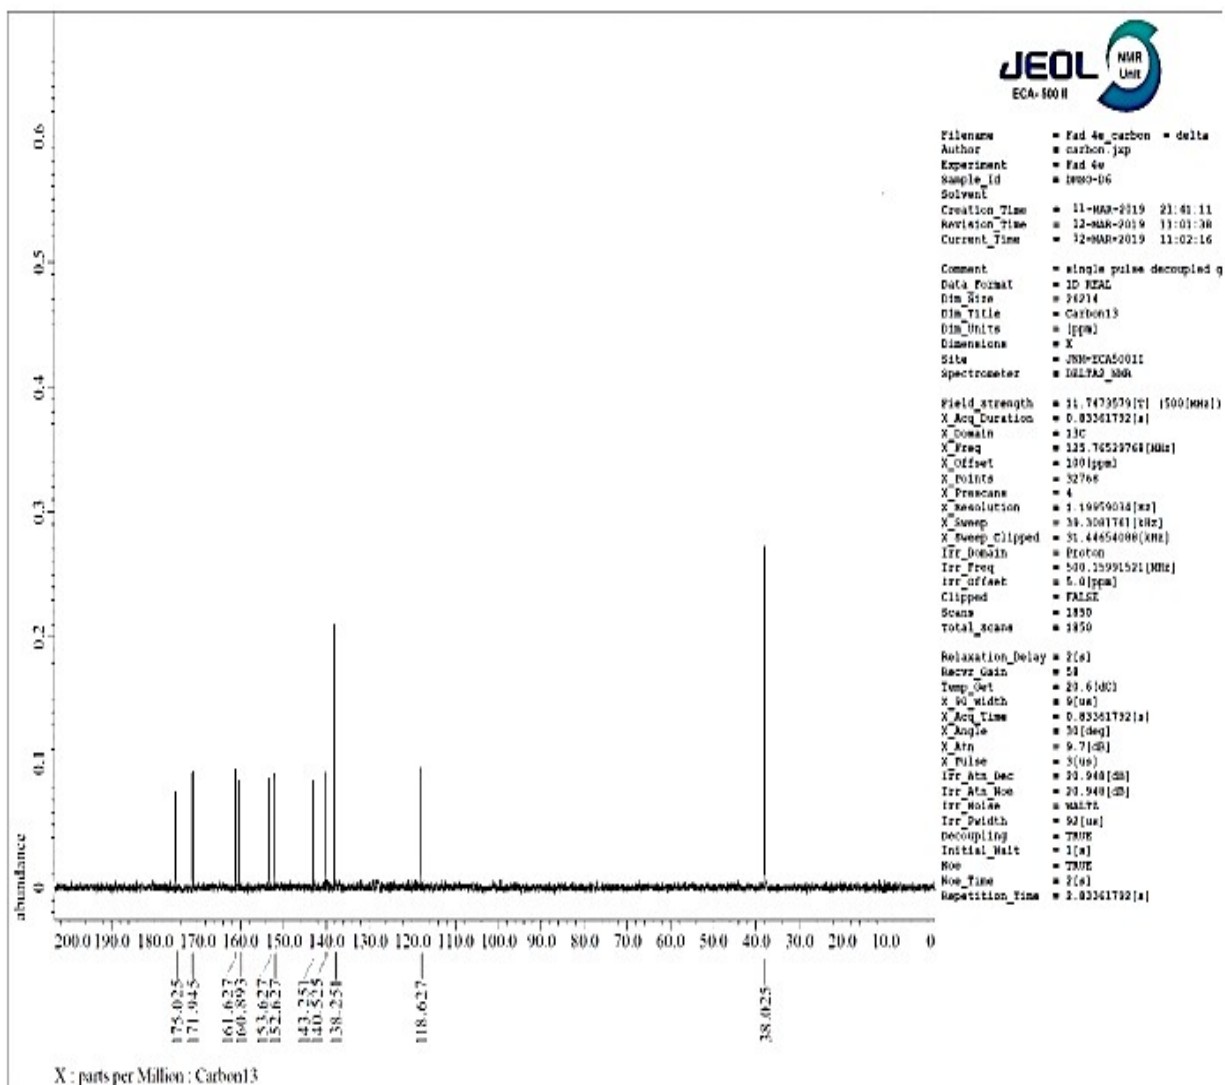

Fig. (S20): <sup>13</sup>C NMR Spectrum of Compound (12)



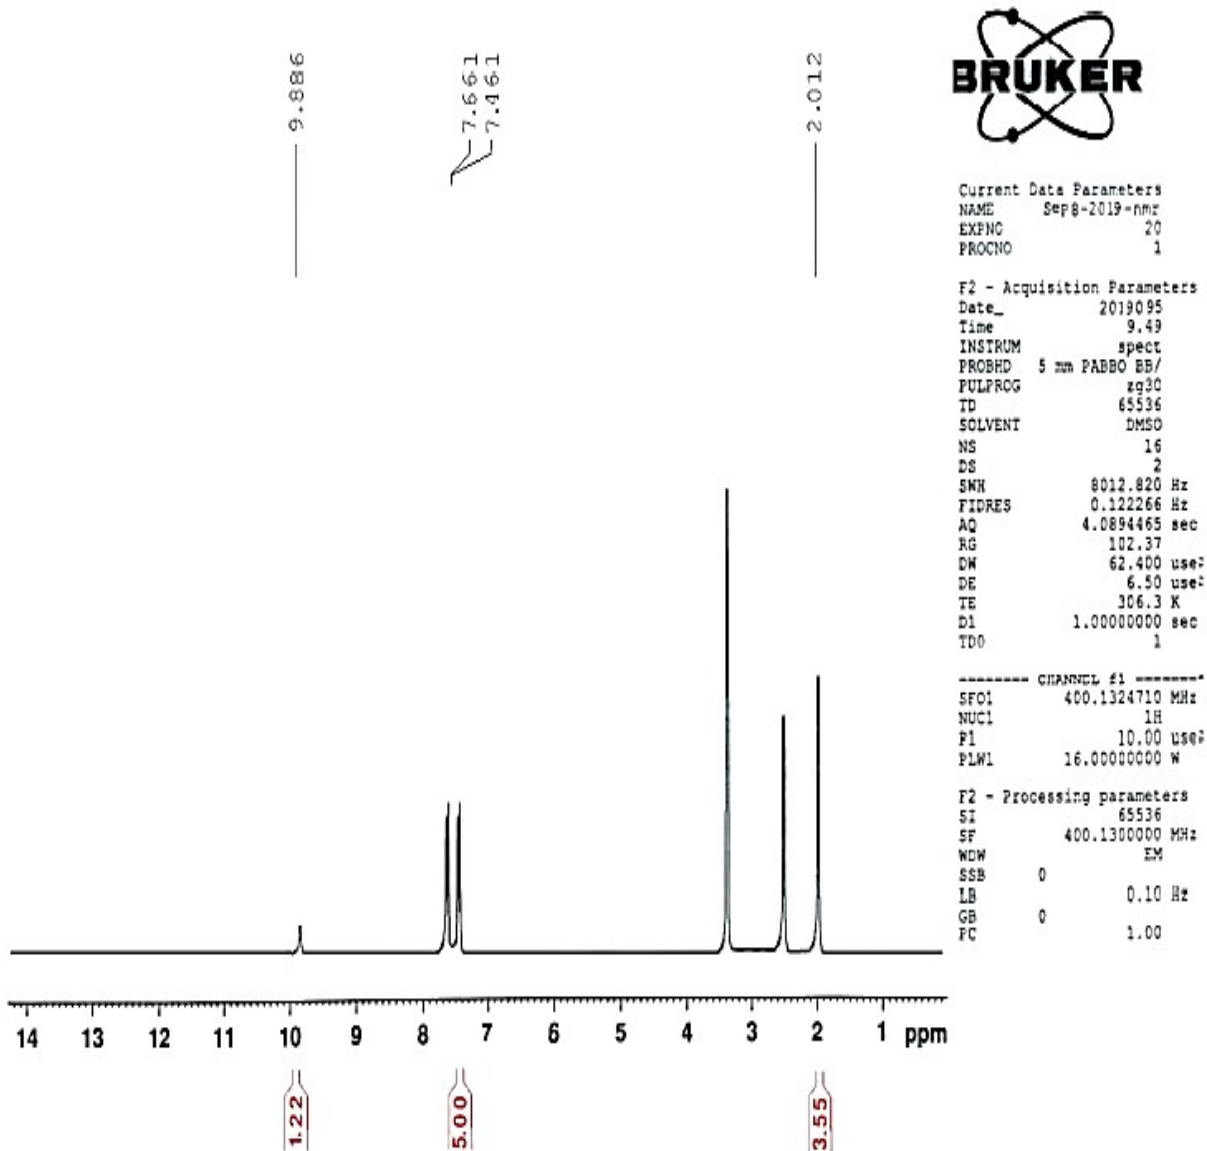

Fig. (S21): <sup>1</sup>H NMR Spectrum of Compound (15)

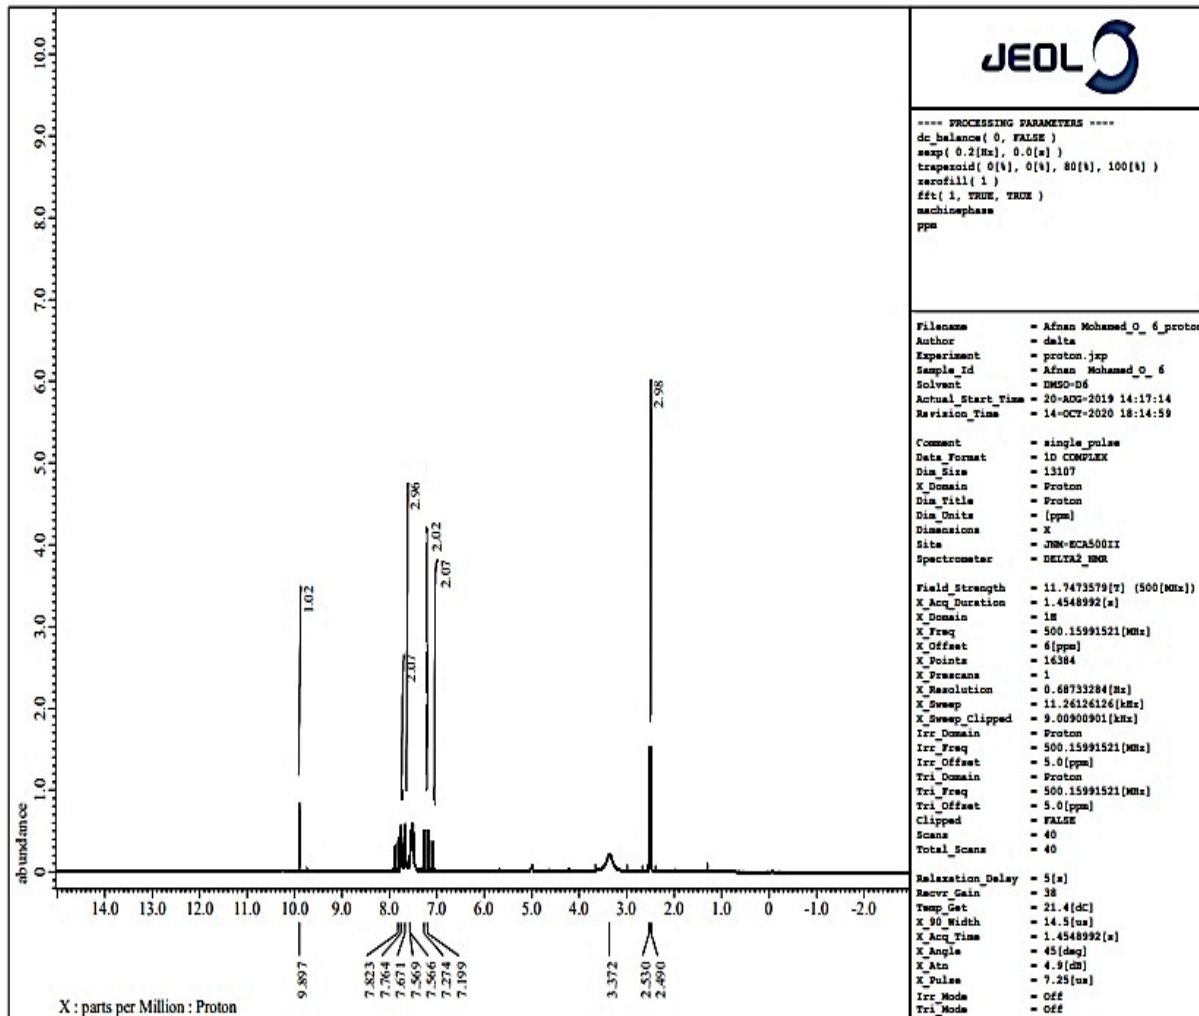

Fig. (S22): <sup>1</sup>H NMR Spectrum of Compound (16)

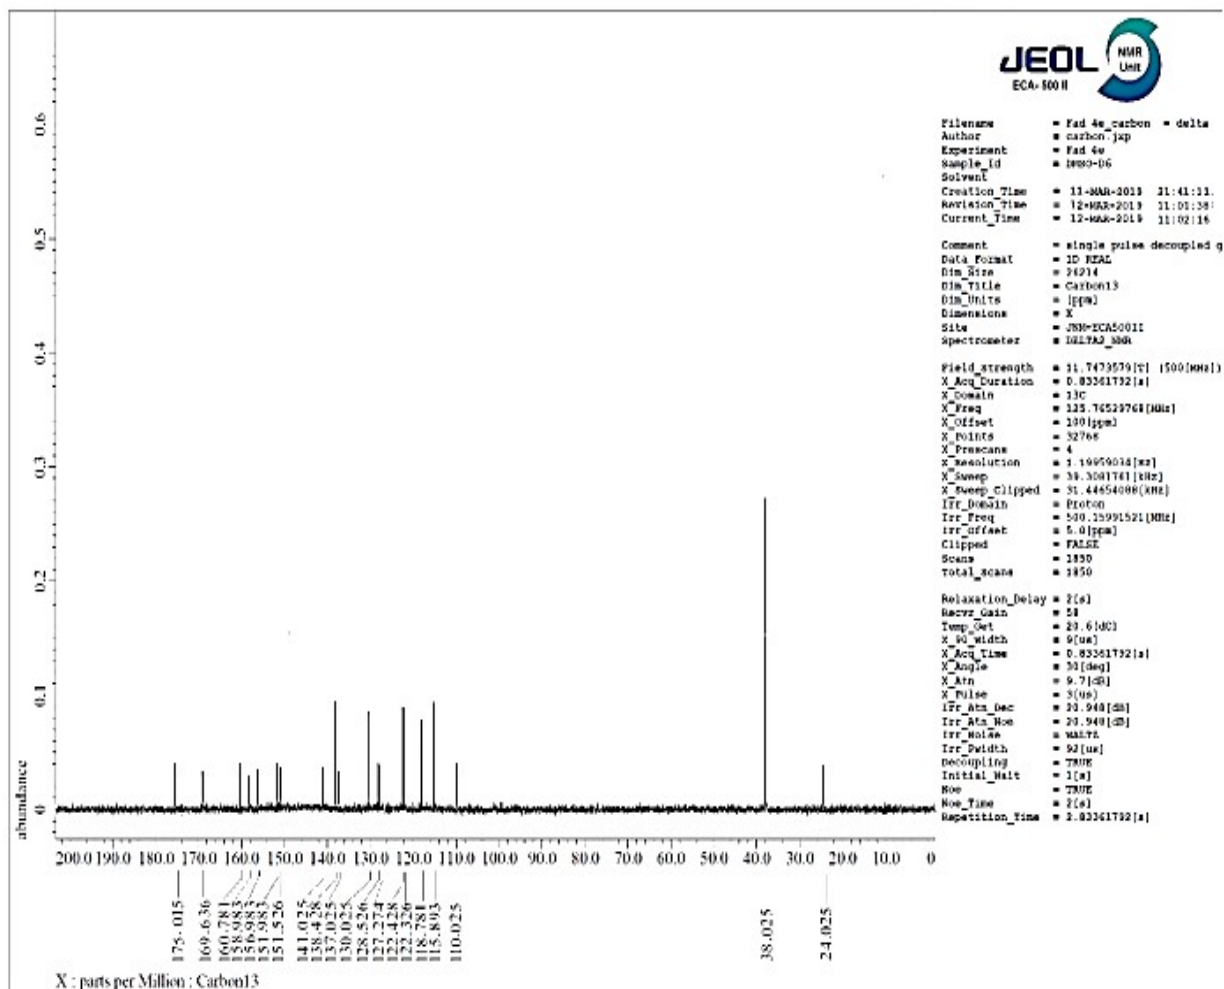

Fig. (S23):  $^{13}\text{C}$  NMR Spectrum of Compound (16)

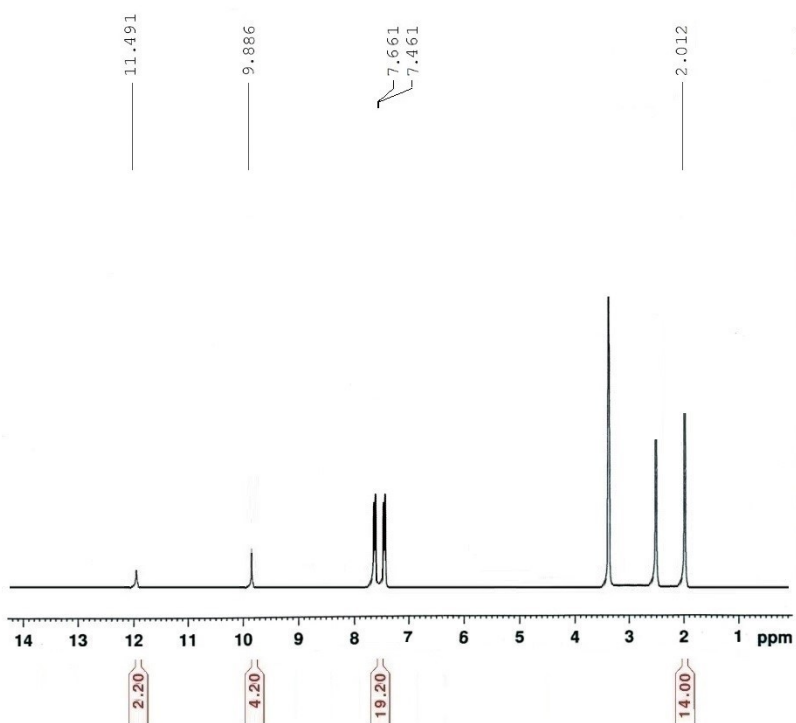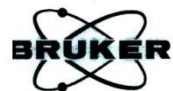

Current Data Parameters  
 NAME Sep8-2019-nmr  
 EXPNO 20  
 PROCNO 1

F2 - Acquisition Parameters  
 Date\_ 2019098  
 Time 9.49  
 INSTRUM spect  
 PROBED 5 mm PABBO BB/  
 PULPROG zg30  
 TD 65536  
 SOLVENT DMSO  
 NS 16  
 DS 2  
 SMH 8012.820 Hz  
 FIDRES 0.122266 Hz  
 AQ 4.089465 sec  
 RG 102.37  
 DM 62.400 usec  
 DE 6.50 usec  
 TE 306.3 K  
 D1 1.00000000 sec  
 TD0 1

----- CHANNEL f1 -----  
 SFO1 400.1324710 MHz  
 NUC1 1H  
 P1 10.00 usec  
 PLW1 16.00000000 W

F2 - Processing parameters  
 SI 65536  
 SF 400.1300000 MHz  
 NDNW EM  
 SSB 0  
 LB 0.10 Hz  
 GB 0  
 PC 1.00

Fig. (S24): <sup>1</sup>H NMR Spectrum of Compound (17)

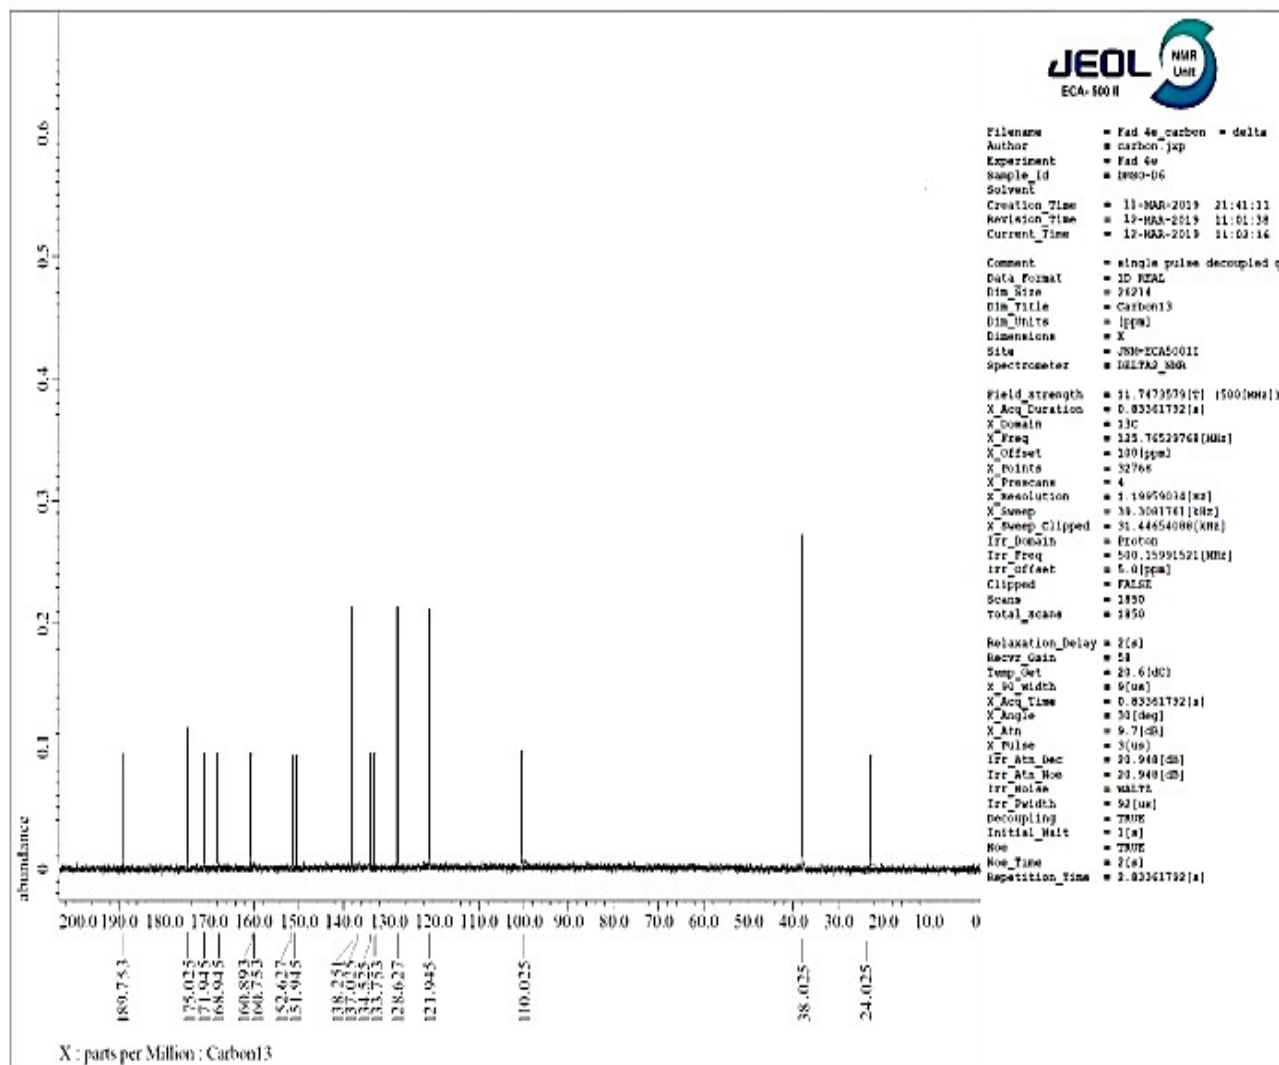

Fig. (S25):  $^{13}\text{C}$  NMR Spectrum of Compound (17)

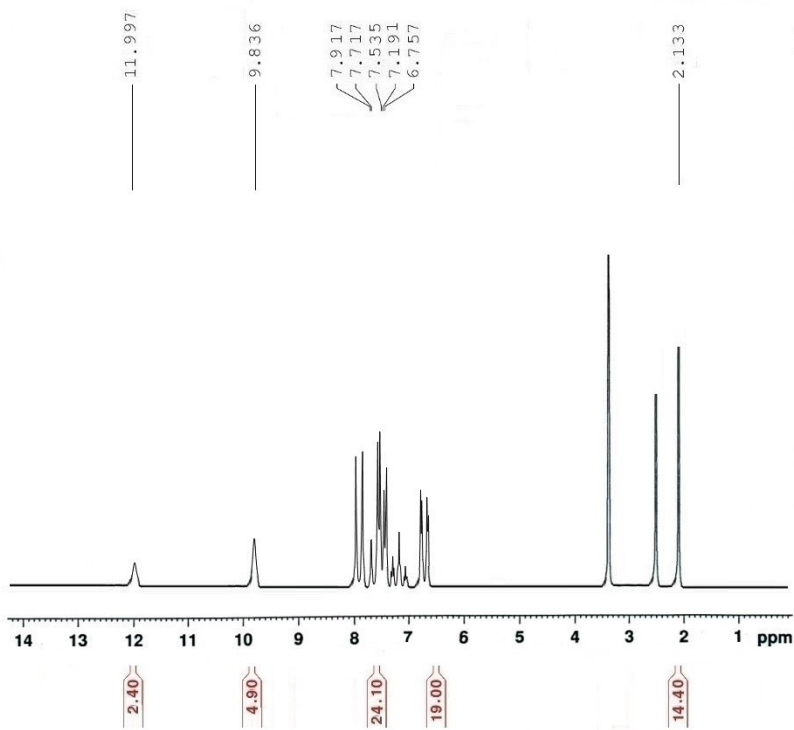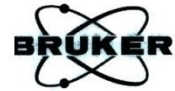

```

Current Data Parameters
NAME      Sep8-2019-nmr
EXPNO    20
PROCNO   1

F2 - Acquisition Parameters
Date_    2019098
Time     9.49
INSTRUM  spect
PROBHD   5 mm PABBO BB/
PULPROG  zg30
TD       65536
SOLVENT  DMSO
NS       16
DS       2
SMH      8012.820 Hz
FIDRES   0.122266 Hz
AQ       4.089465 sec
RG       102.37
DM       62.400 usec
DE       6.50 usec
TE       306.3 K
D1       1.00000000 sec
TD0      1

----- CHANNEL f1 -----
SFO1    400.1324710 MHz
NUC1     1H
P1       10.00 usec
PLW1    16.00000000 W

F2 - Processing parameters
SI       65536
SF       400.1300000 MHz
WDW      EM
SSB      0
LB       0.10 Hz
GB       0
PC       1.00
  
```

Fig. (S26): <sup>1</sup>H NMR Spectrum of Compound (18)

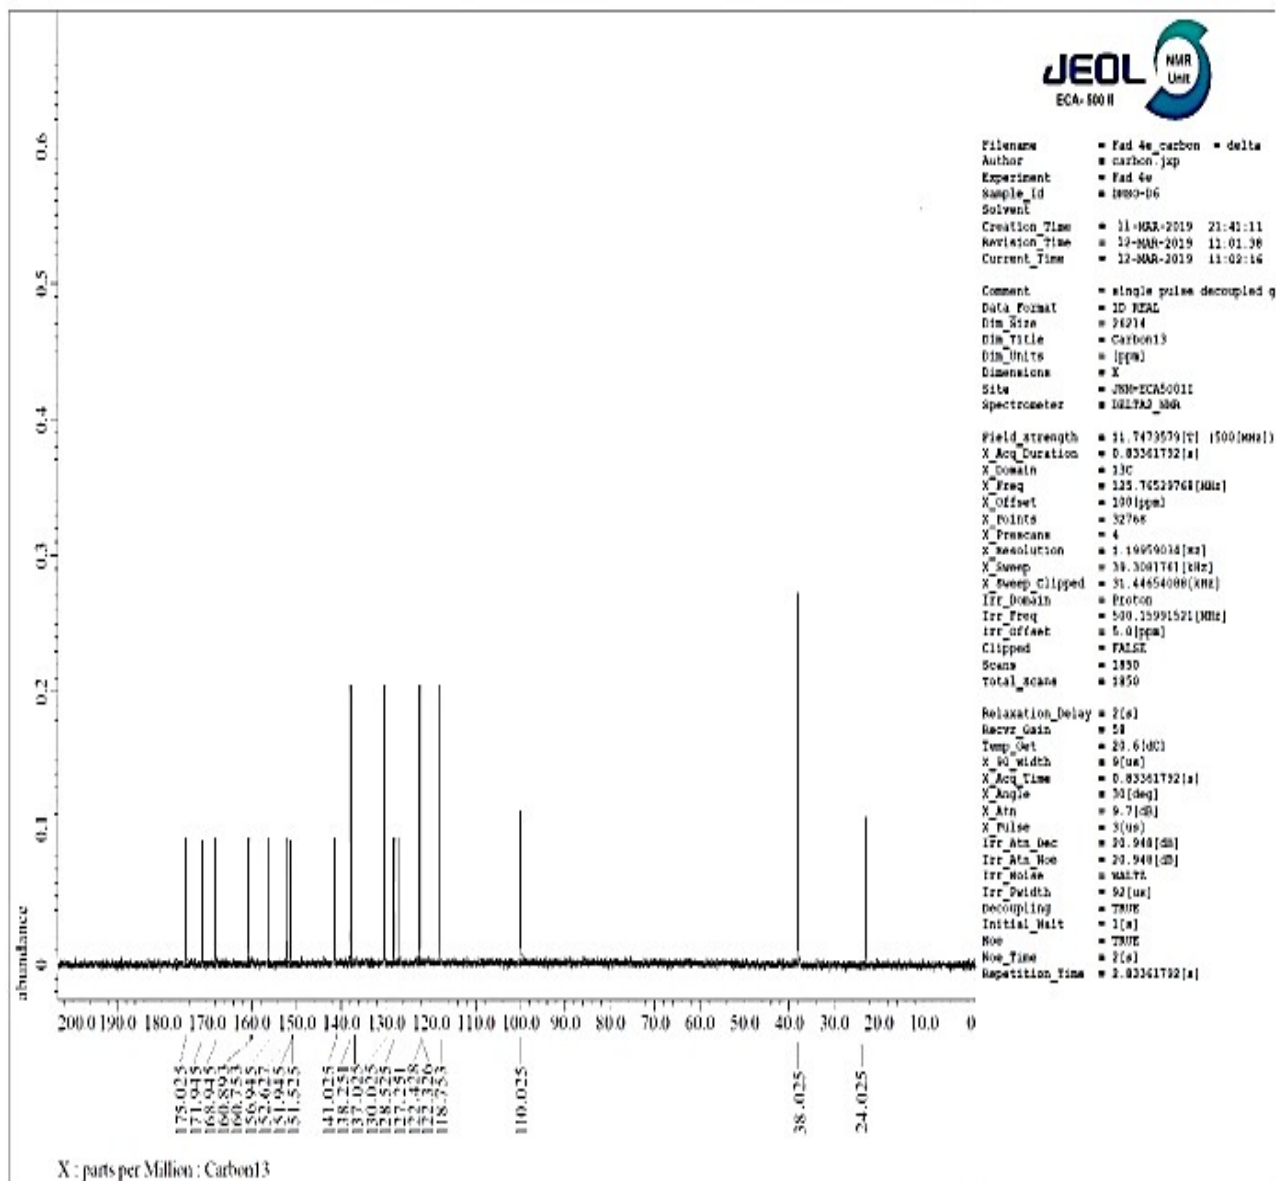

Fig. (S27):  $^{13}\text{C}$  NMR Spectrum of Compound (18)

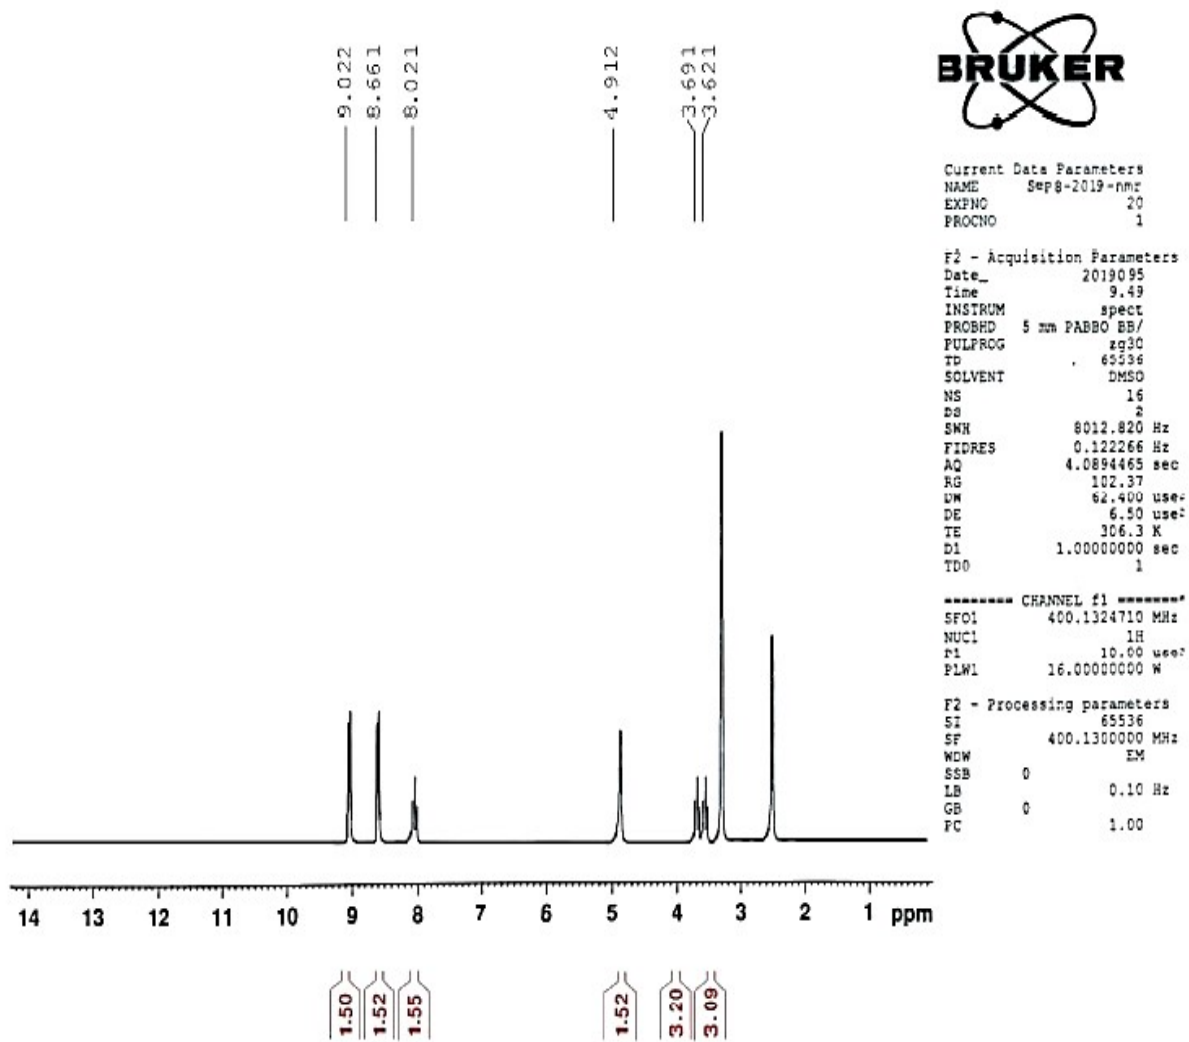

Fig. (S28): <sup>1</sup>H NMR Spectrum of Compound (19)



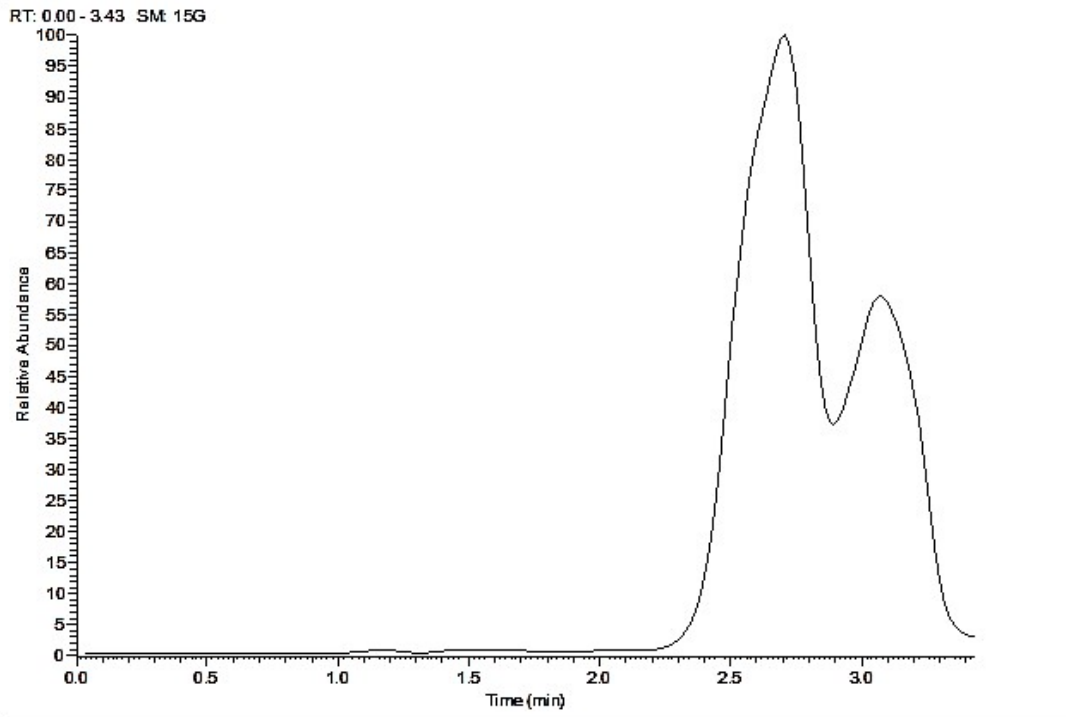

asmaa shmed -24-BTPH#159 RT: 2.68 AV: 1 NL: 4.88E5  
T: {0,0} +c EI/Ful ms [40.00-1000.00]

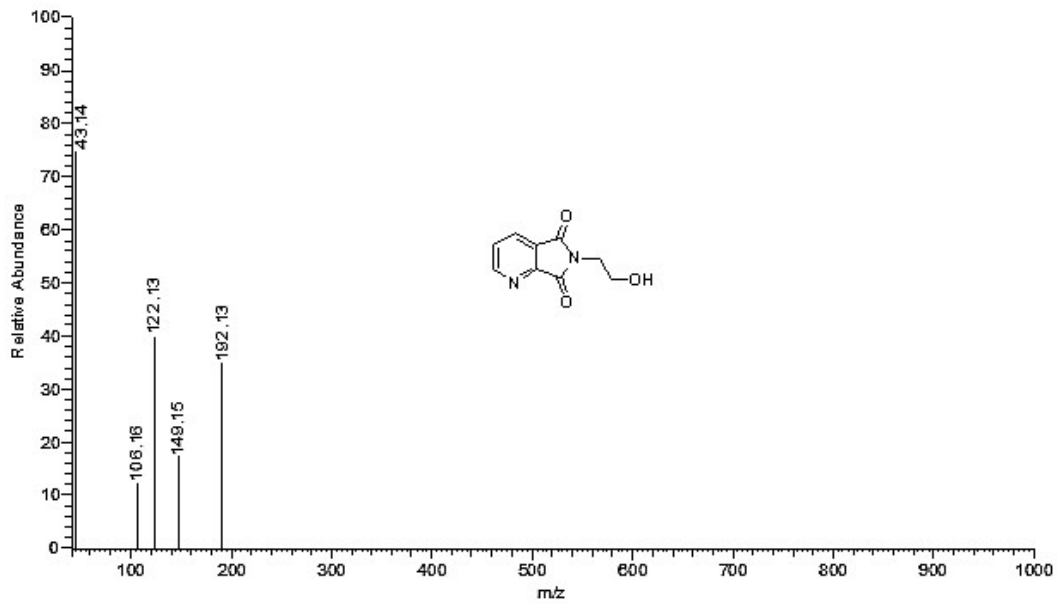

Fig. (S29): MS Spectrum of Compound (19)

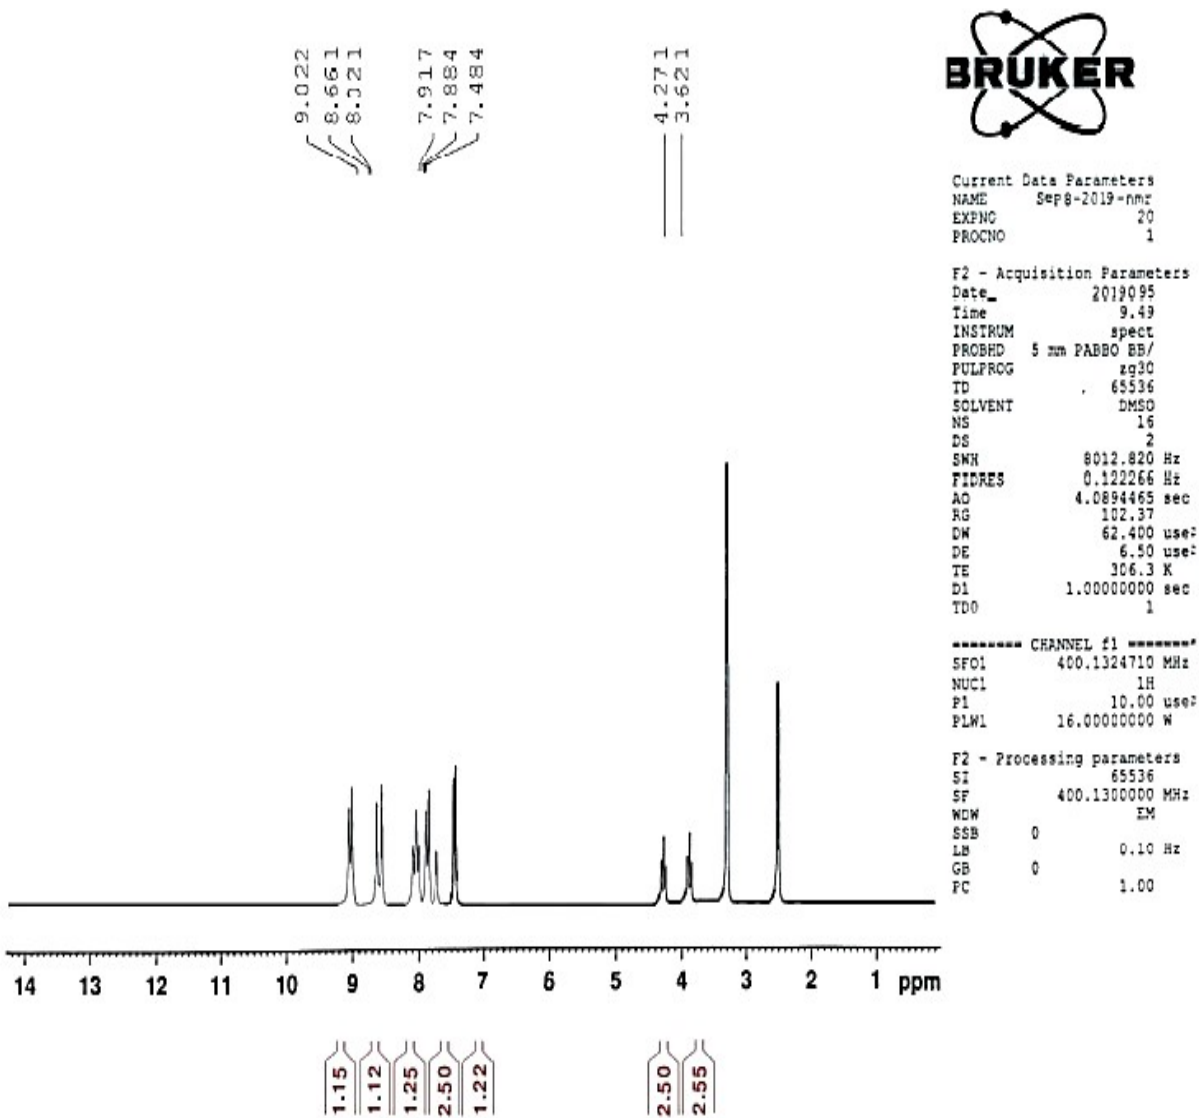

Fig. (S30):  $^1\text{H}$  NMR Spectrum of Compound (20)

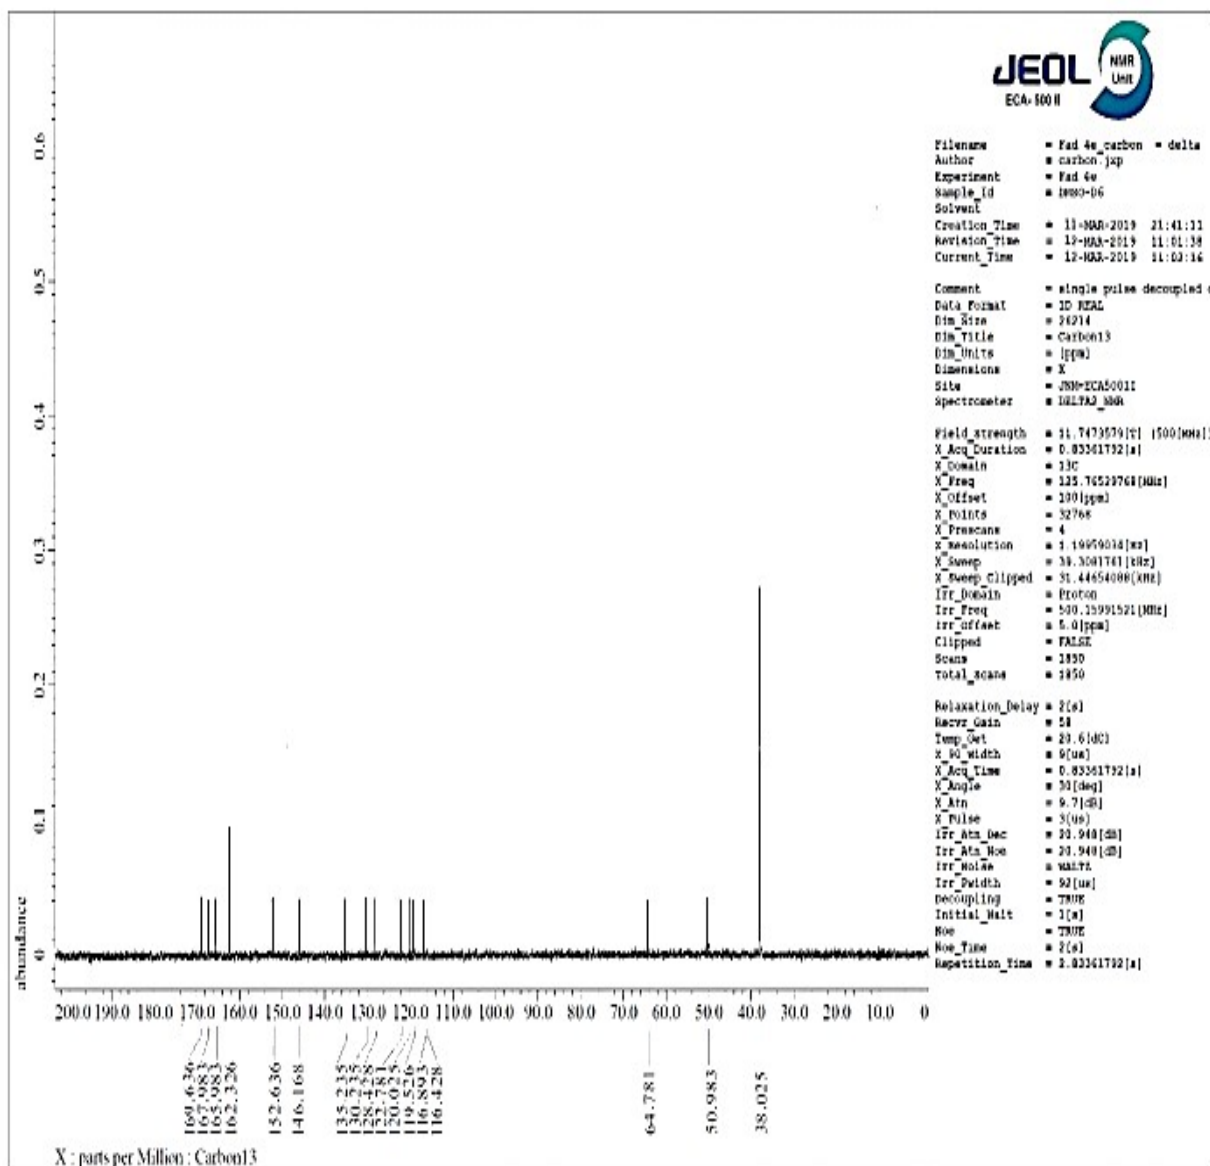

Fig. (S31):  $^{13}\text{C}$  NMR Spectrum of Compound (20)

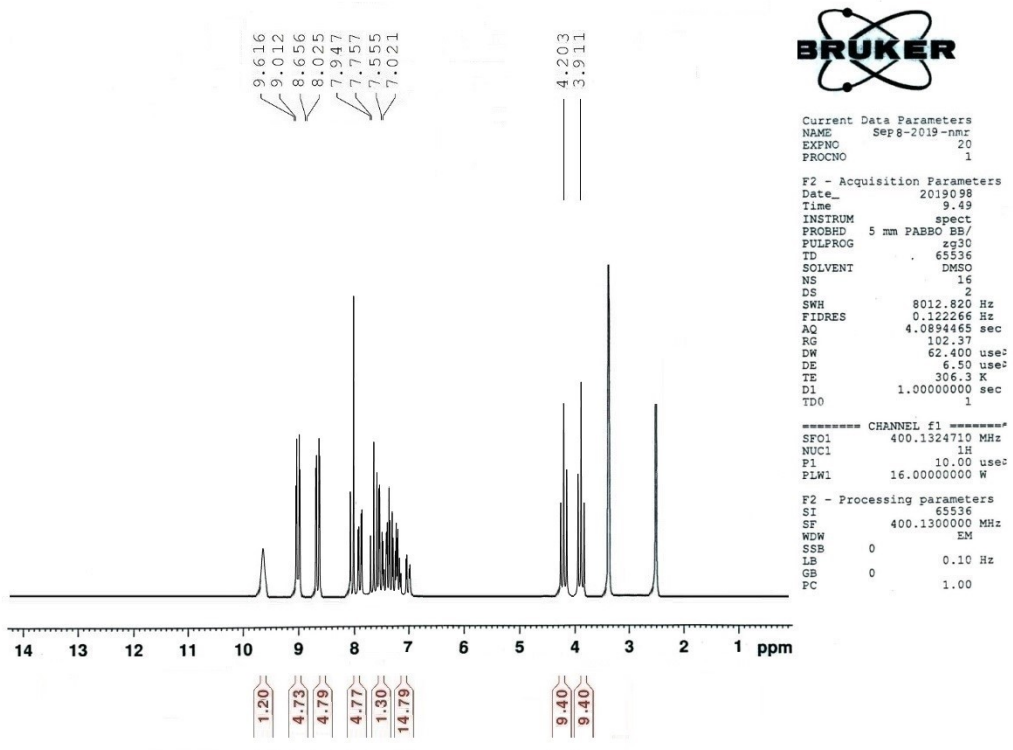

Fig. (S32): <sup>1</sup>H NMR Spectrum of Compound (22)

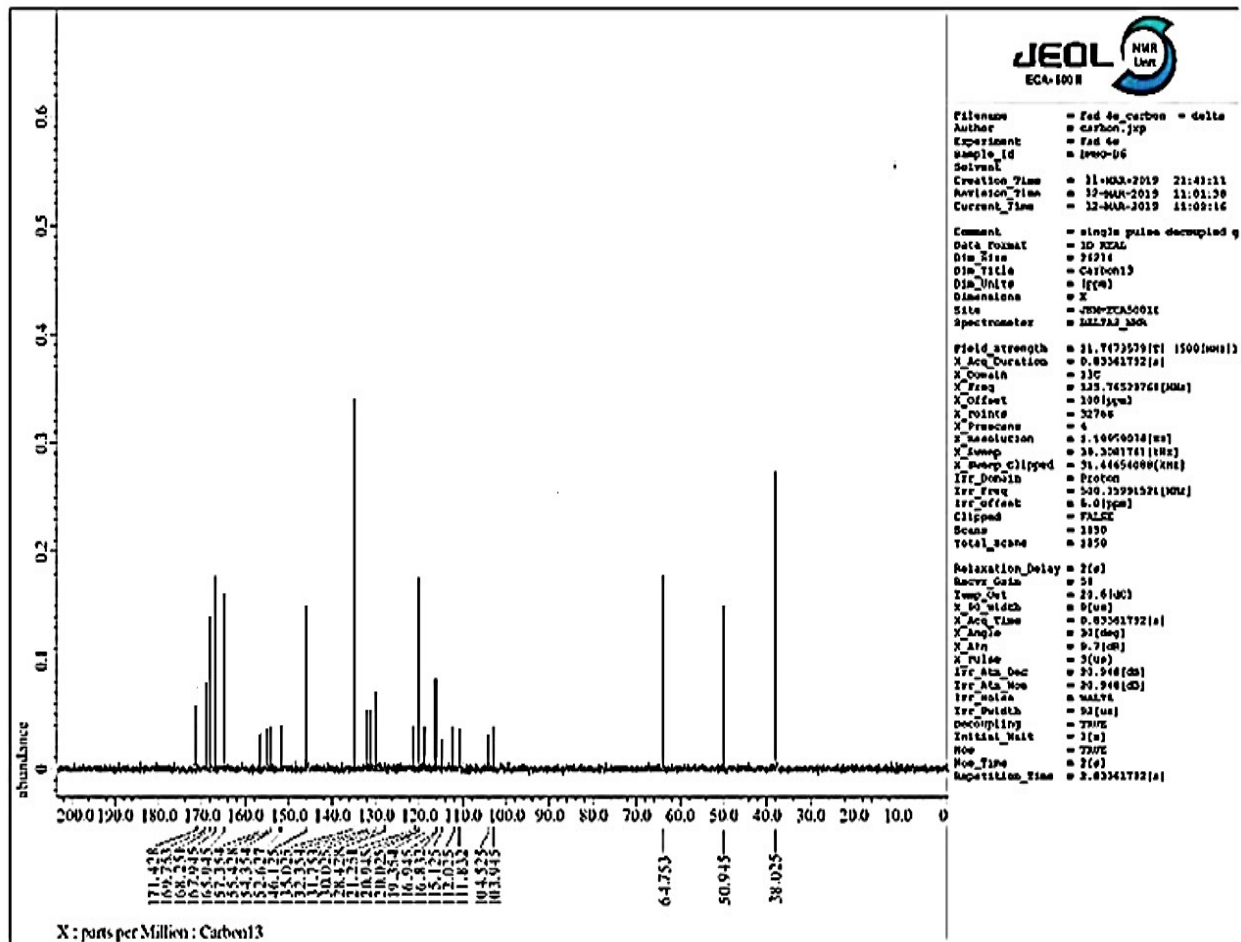

Fig. (S33):  $^{13}\text{C}$  NMR Spectrum of Compound (22)
